# Supplementary material for: Current practice of usual clinic blood pressure measurement in people with and without diabetes: a survey and prospective ‘mystery shopper’ study in UK primary care
Source: PubMed Central journal article supplement (PMC5898319; doi:10.1136/bmjopen-2017-020589), 2018-04-12
Supplement: bmjopen-2017-020589.draft_revisions.pdf [file bmjopen-2017-020589.draft_revisions.pdf]

# BMJ Open

BMJ Open is committed to open peer review. As part of this commitment we make the peer review history of every article we publish publicly available.

When an article is published we post the peer reviewers' comments and the authors' responses online. We also post the versions of the paper that were used during peer review. These are the versions that the peer review comments apply to.

The versions of the paper that follow are the versions that were submitted during the peer review process. They are not the versions of record or the final published versions. They should not be cited or distributed as the published version of this manuscript.

BMJ Open is an open access journal and the full, final, typeset and author-corrected version of record of the manuscript is available on our site with no access controls, subscription charges or pay-per-view fees (<http://bmjopen.bmj.com>).

If you have any questions on BMJ Open's open peer review process please email [info.bmjopen@bmj.com](mailto:info.bmjopen@bmj.com)

# BMJ Open

## Current practice of usual clinic blood pressure measurement in people with and without diabetes: a survey and prospective "mystery shopper" study in UK primary care

|                                 |                                                                                                                                                                                                                                                                 |
|---------------------------------|-----------------------------------------------------------------------------------------------------------------------------------------------------------------------------------------------------------------------------------------------------------------|
| Journal:                        | <i>BMJ Open</i>                                                                                                                                                                                                                                                 |
| Manuscript ID                   | bmjopen-2017-020589                                                                                                                                                                                                                                             |
| Article Type:                   | Research                                                                                                                                                                                                                                                        |
| Date Submitted by the Author:   | 10-Nov-2017                                                                                                                                                                                                                                                     |
| Complete List of Authors:       | Stevens, Sarah; University of Oxford, Nuffield Department of Primary Care Health Sciences<br>McManus, Richard; University of Oxford, Dept of Primary Care Health Sciences<br>Stevens, Richard; University of Oxford, Nuffield Dept Primary Care Health Sciences |
| <b>Primary Subject Heading</b>: | Cardiovascular medicine                                                                                                                                                                                                                                         |
| Secondary Subject Heading:      | Evidence based practice, General practice / Family practice, Health services research, Epidemiology, Diabetes and endocrinology                                                                                                                                 |
| Keywords:                       | PRIMARY CARE, Hypertension < CARDIOLOGY, General diabetes < DIABETES & ENDOCRINOLOGY, Protocols & guidelines < HEALTH SERVICES ADMINISTRATION & MANAGEMENT, Quality in health care < HEALTH SERVICES ADMINISTRATION & MANAGEMENT                                |
|                                 |                                                                                                                                                                                                                                                                 |

SCHOLARONE™  
Manuscripts

1  
2  
3  
4  
5 **Title: Current practice of usual clinic blood pressure measurement in**  
6 **people with and without diabetes: a survey and prospective “mystery**  
7 **shopper” study in UK primary care**  
8  
9

10  
11 **S L Stevens<sup>1</sup>, R J McManus<sup>1</sup>, R J Stevens<sup>1</sup>**  
12

- 13  
14 1. Nuffield Department of Primary Care Health Sciences, University of Oxford, Radcliffe  
15 Observatory Quarter, Woodstock Road, Oxford, OX2 6GG  
16

17 Corresponding author: Sarah Stevens, [sarah.stevens@phc.ox.ac.uk](mailto:sarah.stevens@phc.ox.ac.uk)  
18  
19

20  
21 Manuscript word count: 2739  
22  
23  
24  
25  
26  
27  
28  
29  
30  
31  
32  
33  
34  
35  
36  
37  
38  
39  
40  
41  
42  
43  
44  
45  
46  
47  
48  
49  
50  
51  
52  
53  
54  
55  
56  
57  
58  
59  
60

## Abstract

Objectives: Hypertension trials and epidemiological studies use multiple clinic blood pressure (BP) measurements at each visit. Repeat measurement is also recommended in international guidance, however little is known about how BP is measured routinely. This is important for individual patient management and because routinely recorded readings form part of research databases. We aimed to determine the current practice of BP measurement during routine general practice appointments.

Design: (1) An online cross-sectional survey and (2) A prospective “mystery shopper” study where patients agreed to report how BP was measured during their next appointment.

Setting: Primary care

Participants: Patient charity/ involvement group members completing an online survey between July 2015 and January 2016. 334 participants completed the prospective study (51.5% male, mean age = 59.3 years) of which 279 (83.5%) had diabetes.

Primary outcome: Proportion of patients having BP measured according to guidelines.

Results: 217 participants with (183) and without diabetes (34) had their BP measured at their last appointment. BP was measured in line with UK guidance in 63.7% and 60.0% of participants with and without diabetes respectively. Initial pressures were significantly higher in those who had their BP measured more than once compared to only once ( $p=0.016/0.089$  systolic and  $p<0.001/=0.022$  diastolic, in patients with/without diabetes respectively).

Conclusions: Current practice of routine BP measurement in UK primary care is concordant with guidelines in the majority of cases. Guidelines may be less robust than primary study protocols and miss masked hypertension. Apparent relationships between BP and outcomes may be attenuated in studies using routine electronic healthcare databases which do not account for this.

### Strengths and limitations of this study

- This survey has a novel “mystery-shopper” design, minimising biases that may be introduced by self-reported practitioner behaviour.
- We have examined how adherence to guidelines varies according to patient characteristics, whereas previous studies have taken a healthcare professional view.
- The use of an online survey may have resulted in an under-representation of some groups, such as the very elderly.
- Larger studies are required to confirm our findings with respect to second and third blood pressure readings.

## Introduction

Measurement of blood pressure (BP) is carried out in general practice by healthcare professionals on a daily basis. Such measurement is important for the diagnosis and management of hypertension, a major risk factor for cardiovascular disease (CVD) in both the general population,(1) and even more so in those with diabetes.(2) Hypertension trials and major epidemiological studies typically measure clinic BP using strict protocols on three or more times per visit. For example the SPRINT(3) and ACCORD(4) trials used the mean of three readings taken automatically to guide treatment. Repeated measurement protocols are also recommended in the UK,(5) European,(6) and North American(7) hypertension guidelines. For example, current UK guidance states that BP should be re-measured if it is initially high, or if two measurements differ substantially, with out-of-office monitoring recommended in those with sustained high BP in clinic.(5) This reflects concerns that in many patients, clinic BP readings, particularly initial readings, may be systematically higher than BP during usual daily activities.(8)

Many factors can affect the accuracy of BP measurement and the number of measurements used can influence estimates of BP control.(9,10) Measurement practices may also vary depending on the focus of the consultation or patient characteristics and recorded blood pressures may also be influenced by incentive schemes such as the UK Quality and Outcomes Framework.(11,12) Potential differences between primary study protocols and clinical practice have implications for the generalisability and implementation of research findings. For example, SPRINT found that treatment to a systolic BP target of 120 mmHg resulted in fewer cardiovascular events compared to a target of 140 mmHg in low risk patients.(4) However others have argued that mean automatically measured BP of 120 mmHg may correspond to a routine measurement of 135-140 mmHg(15) and ACCORD (conducted in patients with diabetes) failed to show an effect of intensive treatment.(5)

Furthermore, increasing numbers of observational studies in electronic healthcare databases rely on routinely collected BP measurements. In particular, the recommended cardiovascular risk calculator in the UK, QRISK2,(14) was derived using such data. It is important to understand how blood pressures recorded in these databases were obtained, in order to reliably compare observational database and primary study results.

However, little is known about how BP is measured in routine practice. A 2006 survey of UK general practitioners' (GPs') adherence to hypertension guideline recommendations relied on self-reported data and did not ask about the use of repeat measurements.(15) Other European studies have focussed on whether implementation of lifestyle or treatment changes adheres to guidelines,(16) or reasons for non-adherence.(17) These studies assume that an accurate BP reading is obtained initially and ignore the specifics of BP measurement. We therefore sought to determine the current practice of BP measurement during routine appointments in UK primary care.

## Patients and methods

We conducted an online survey of patients, followed by a prospective survey of primary care consultations.

### Online survey

1  
2  
3 An online survey was advertised through charities and patient involvement groups (“University of  
4 the Third Age”, “Blood Pressure UK”, “Citizen Scientist”, “Patients Active in Research”, “Call for  
5 Participants” and “Research for the Future (Help BEAT Diabetes)”) between 23rd July 2015 and 24th  
6 January 2016. Respondents anonymously reported basic demographic and health information, if and  
7 how their BP was measured at their last appointment and (recall permitting) their last BP reading  
8 (Supplement).  
9

### 10 **Prospective study**

11 Participants completing the online survey were invited to take part in a prospective study. They were  
12 told the study would ask similar questions to those already asked about their BP after their next  
13 primary care appointment. Those wishing to take part gave explicit consent, provided an email  
14 address and were asked when they expected their next appointment to be. After the anticipated  
15 time of this appointment, a link to an online questionnaire was emailed to participants. This asked  
16 whether BP was measured at the appointment; and if so, how many times, and (recall permitting)  
17 for up to three systolic and diastolic BP values (Supplement). The questionnaire was open from 23rd  
18 July 2015 to 16th June 2016. Two patient representatives helped design the study materials and  
19 three were asked to pilot the survey websites to test functionality. The study was approved by the  
20 Medical Sciences Interdivisional Research Ethics Committee, University of Oxford (reference: MS-  
21 IDREC-C1-2015-095).  
22  
23  
24  
25

### 26 **Statistical Analysis**

27 The prospective study was powered to estimate the proportion of people having their BP measured  
28 in line with guidelines at the 95% confidence level with an accuracy of +/-5%. Assuming a proportion  
29 of 10%, 139 respondents who had had their BP measured was required.(18)  
30

31 Demographic and clinical history data were summarised using means and standard deviations or  
32 proportions. Mean BP was summarized with 95% confidence intervals and ranges. Respondents  
33 were classified as hypertensive if they answered yes to the question “Have you got high blood  
34 pressure or have you ever been told by your GP that you have high blood pressure?”. Responses  
35 were assessed against NICE guidance and BP was deemed to have been measured according to  
36 guidelines if BP was measured; a) once and the reading was below 140/90 mmHg, b) twice if the  
37 initial reading was above 140/90 mmHg and the first two readings differed by less than 5 mmHg  
38 systolic, or c) three times if the first reading was above 140/90 mmHg and the first two readings  
39 differed by more than 5 mmHg systolic.(5) Proportions were compared using two-sided tests of  
40 proportions, under the assumption of large samples, at the 5% level. Due to an unexpectedly large  
41 proportion of participants with diabetes, a decision to stratify all prospective study analyses by  
42 patient diabetes status was made after data collection.  
43  
44  
45  
46

47 Since behaviour amongst professionals from the same practice may be similar, sensitivity analyses  
48 were carried out by randomly selecting one observation from each postcode district (assuming  
49 respondents from different districts are registered to distinct practices). We also conducted  
50 sensitivity analyses excluding prospective responses that were suspected of being duplicate  
51 submissions of the same initial survey data. Analysis was conducted using Stata 14,(19) and R  
52 3.3.1.(20)  
53  
54  
55

## 56 **Results**

In total 2176 unique users visited the survey site, of whom 756 completed the initial online survey, with complete data available in 743 individuals (623 with diabetes, 83.9%). Consent for the prospective study was given by 593 participants and was completed by 334 participants (279 with diabetes, 83.5%) (Fig. 1). The characteristics of those completing the initial and prospective surveys were broadly similar (Table S1, Supplement).

### **Initial survey**

Of the 743 people completing the first survey, 489 (65.8%) reported having had their BP measured at their last appointment: 156 (31.9% of 489) by a GP, 321 (65.6%) by a nurse and 12 (2.5%) in the waiting room. Most respondents (480/489, 98.2%) could recall how many BP readings were taken: 286 (59.6% of 480) one, 144 (30.0%) two and 50 (10.4%) three or more readings. Results stratified by diabetes status are given in the supplement (Tables S2 and S3). Only 88 patients (11.8%) recalled ever having their BP measured in both arms at any one previous appointment. Compared to normotensives (20/330, (6.7%)), respondents with a previous diagnosis of hypertension (68/413, (16.5%)) were more likely to report having had their BP measured in both arms at any appointment previously.

### **Prospective study**

Baseline characteristics for those with and without diabetes completing the prospective study after a further GP appointment are given in Table 1. Of the 279 participants with diabetes completing the follow-up questionnaire, 183 (65.6%) had their BP measured at the appointment: 38 (20.8%) by a GP, 139 (76.0%) by a nurse and 6 (3.3%) by themselves in the waiting room. Of the 55 participants without diabetes, 34 (61.8%), had their BP measured: 21 (61.8%) by a GP, 11 (32.4%) by a nurse and 2 (5.9%) by themselves in the waiting room.

#### *Participants with diabetes*

Of the 183 participants with diabetes who had their BP measured, 91 (49.7%) could recall a value for all of the BP readings given. Fifty-eight respondents (63.7%, 95% CI [53.0 to 73.6%]) had their BP measured according to guidelines. Mean BP values by reading number are presented graphically in Fig. 2A (systolic) and Fig. 2B (diastolic, see Table S4 for raw data). Initial systolic and diastolic blood pressures were lower in participants who had their BP measured only once than in those who had it measured two or more times (mean systolic difference = 8.0 mm Hg, 95% CI [1.2 to 14.5 mm Hg],  $p=0.016$  and mean diastolic difference = 9.9 mm Hg, 95% CI [5.1 to 14.6 mm Hg],  $p<0.001$ ).

The proportion of participants with diabetes who had their BP measured multiple times was similar regardless of hypertensive or treatment status, or measurement personnel (Table 2, top left). However they were more likely to be asked to monitor their BP at home when BP was measured by a GP compared to a nurse (Table 2, top right). Those who had their BP measured once, twice and three or more times, were asked to monitor their BP at home in 10/109 (9.2%, 95% CI [3.8 to 14.6%]), 11/51 (21.6%, 95% CI [10.3% to 32.9%]) and 7/23 (30.4%, 95% CI [11.6 to 49.2%]) cases respectively.

#### *Participants without diabetes*

Of the 34 participants without diabetes who had their BP measured, 20 (58.8%) could recall a value for all of the BP readings given. Twelve respondents (60.0%, 95% CI [36.1% to 80.9%]) had their BP

1  
2  
3 measured according to guidelines. Mean BP values by reading number are presented graphically in  
4 Fig. 3A (systolic) and Fig. 3B (diastolic, see Table S5 for raw data). Patterns of repeat BP  
5 measurement were similar to those observed in participants with diabetes, although numbers in this  
6 group were smaller. Initial systolic blood pressures were non-significantly lower in participants who  
7 had their BP measured only once than in those who had it measured two or more times (mean  
8 systolic difference = 21.8 mm Hg, 95% CI [-3.7 to 47.3 mm Hg],  $p=0.089$ ). However, a significant  
9 difference was observed for diastolic pressure (mean diastolic difference = 14.1 mm Hg, 95% CI [2.3  
10 to 26.0 mm Hg],  $p=0.022$ ).  
11  
12

13 The proportion of participants without diabetes who had their BP measured multiple times was  
14 similar regardless of hypertensive or treatment status, or measurement personnel (Table 2, bottom  
15 left). However, those with hypertension were more likely to be asked to monitor their BP at home  
16 compared to normotensives (Table 2, bottom right). Those who had their BP measured once, twice  
17 and three or more times, were asked to monitor their BP at home in 5/23 (21.7%, 95% CI [4.9 to  
18 38.6%]), 3/5 (60.0%, 95% CI [17.1% to 100.0%]) and 3/6 (50.0%, 95% CI [10.0 to 90.0%]) cases  
19 respectively.  
20  
21

### 22 **Sensitivity analyses**

23 Results were similar after randomly sampling responses from unique postcode districts (Tables S6 to  
24 S8) or when excluding prospective responses suspected of being duplicate submissions of the initial  
25 survey data (Tables S9 to S11).  
26  
27

## 28 **Discussion**

### 29 **Summary**

30 This study has shown that a second BP measurement at clinic visit is more likely to be taken if the  
31 initial BP measurement is high. This is consistent with UK guidelines. However, there is no clear  
32 evidence that the decision to take a third measurement follows guidelines. The recommendation  
33 that a third measurement be taken only when the first two are discrepant (first measurement above  
34 threshold but second below threshold for diagnosis of hypertension) was not obviously reflected in  
35 our data, although confidence intervals are wide. Although the majority of this evidence relates to  
36 people with diabetes, similar BP measurement practices were observed in those without diabetes.  
37  
38  
39  
40

### 41 **Strengths and limitations**

42 The patient centred nature of this study has allowed us to see into the consulting room for the first  
43 time and to determine how BP is measured in “real life”, in those with and without diabetes.  
44 Previous studies have taken a healthcare professional view.<sup>(15)</sup>  
45  
46

47 Our online survey was limited by the use of convenience mechanisms for recruitment, and like many  
48 internet surveys with no known denominator, these results should be interpreted with caution. The  
49 use of an online system itself may have resulted in an under-representation of some groups, such as  
50 the very elderly.<sup>(21)</sup> For the prospective study, we were able to obtain “mystery shopper” type data  
51 on more than two hundred GP and nurse appointments without potentially influencing the  
52 appointment through direct observation by a researcher. To our knowledge, these data are unique.  
53 The lower numbers of respondents without diabetes could limit generalisability if health care  
54  
55  
56  
57



professionals follow protocols less carefully in patients without additional cardiovascular risk factors.(22)

Furthermore, self-reported BP readings may have been subject to rounding error, digit preference or recall error. This introduces uncertainty into some analyses concerning blood pressure values, but the number of measurements taken, is likely to be recalled with greater accuracy, especially in the prospective study.

Fewer than anticipated participants provided all BP readings and therefore we could only estimate the proportion of people with diabetes having their BP measured according to guidelines with an error of +/- 10% (compared to an original target of +/-5%). However we have demonstrated important differences (for example in first systolic BP readings) despite this. Although we have demonstrated that BP is measured in line with guidance in the majority of cases, this was driven by a large number of participants with low BP who had their BP measured only once. Larger studies would be required to confirm our findings, particularly with respect to second and third readings and in those without diabetes.

### **Comparison with existing literature**

A previous review(17) of barriers to hypertension awareness and treatment found that professionals were concerned about the accuracy of individual clinic BP readings. Our results support the idea that professionals treat single readings with caution, particularly those above the diagnostic threshold. This behaviour is concordant with guidelines but as guidance does not reflect measurement in studies of blood pressure monitoring, GPs may be better advised to use multiple readings more widely.(23)

The finding that patients are more likely to be monitored at home if they have high clinic pressures or hypertension is consistent with results from a recent practitioner survey in Canada, (24) where guidance is similar.(25) A recent survey of general practices in the South West of England found that only 1 in 10 GP practices were not following current guidelines for the use of home and ambulatory BP monitoring in the diagnosis of hypertension,(26) which is also consistent with our results in that guidance appears to be followed in most cases.

### **Implications for research and practice**

Our findings indicate that routine BP measurement does not reflect the strict measurement protocols in primary research studies. This has implications for patient care if results from primary research studies cannot be appropriately translated into guidance for routine care (e.g. in the form of adjusted treatment targets). Users of electronic healthcare databases should also be aware of the potential for recording biases(11) which may dilute the observed effect of BP on outcomes and may extend to other biological factors subject to measurement error.

The current practice of BP measurement will, reassuringly, detect white coat hypertension but may not identify those with masked effects (where BP is higher outside of the clinic). This could potentially result in missed diagnoses and sub-optimal treatment. One solution which would not increase workload is use of the PROOF-BP tool which was developed by two of the authors with colleagues.(27) This combines factors associated with home-clinic BP differences with BP readings to identify which patients may exhibit masked or white coat effects and would benefit most from out-of-office monitoring. It accurately identifies hypertension in 93% of cases and is more accurate than

1  
2  
3 current diagnostic guidelines.(28) Implementation of this tool could improve detection of masked  
4 effects and avoid unnecessary out-of-office monitoring.  
5

6 Less than 1 in 5 participants with hypertension reported having their BP measured in both arms at a  
7 single appointment previously. Large differences between arms are associated with vascular disease  
8 and mortality.(29) These results suggest little change since 13% of GPs said they adhered to this  
9 recommendation a decade ago.(15) Other recent estimates suggest that around half of practices  
10 measure BP in both arms as part of the diagnostic procedure,(26) which, although more optimistic,  
11 further demonstrates room for improvement. Barriers to such improvement may include  
12 practitioner discordance with guidance (previously only 30% agreed with the recommendation), or a  
13 lack of a suitable devices.(30)  
14  
15

16 The results of this study provide a preliminary insight into how BP is measured routinely and indicate  
17 that BP is measured in line with guidelines but not with strict study protocols. The impact of these  
18 differences on patient care requires further investigation.  
19  
20  
21  
22  
23

## 24 **Funding**

25 This project is funded by the National Institute for Health Research School for Primary Care Research  
26 (NIHR SPCR). The views expressed are those of the author(s) and not necessarily those of the NHS,  
27 the NIHR or the Department of Health.  
28  
29  
30

## 31 **Conflicts of interest**

32 RM has received BP monitoring equipment for research purposes from Lloyds Pharmacies and  
33 Omron.  
34  
35  
36

## 37 **Contributions**

38 All authors conceived and designed the study. SS was responsible for the management of the study  
39 and carried out the statistical analysis. SS drafted the paper which RS and RM then contributed to.  
40 We thank computer programmers David Judge and Luis Castello (Nuffield Department of Primary  
41 Care Health Sciences, University of Oxford) who developed and managed the survey sites. We also  
42 thank patient representatives Derek Shaw, Valerie Keston-Hole and others for their help developing  
43 the study materials.  
44  
45  
46

## 47 **Data sharing**

48 No additional data are available.  
49  
50  
51  
52  
53  
54  
55  
56  
57  
58  
59  
60

## References

1. Lewington S, Clarke R, Qizilbash N, Peto R, Collins R. Age-specific relevance of usual blood pressure to vascular mortality: A meta-analysis of individual data for one million adults in 61 prospective studies. *Lancet*. 2002;360(9349):1903–13.
2. Adler AI, Stratton IM, Neil HAW, Yudkin JS, Matthews DR, Cull CA, et al. Association of systolic blood pressure with macrovascular and microvascular complications of type 2 diabetes (UKPDS 36): prospective observational study. *BMJ*. 2000;321(7258).
3. The SPRINT Research Group. A Randomized Trial of Intensive versus Standard Blood-Pressure Control. *N Engl J Med*. 2015 Nov 26;373(22):2103–16.
4. The ACCORD Study Group. Effects of Intensive Blood-Pressure Control in Type 2 Diabetes Mellitus. *N Engl J Med*. Massachusetts Medical Society; 2010 Apr 29;362(17):1575–85.
5. National Institute for Health and Care Excellence. Hypertension: Clinical management of primary hypertension in adults (NICE CG127). National Institute for Health and Care Excellence; 2011.
6. Mancia G, Fagard R, Narkiewicz K, Redon J, Zanchetti A, Böhm M, et al. 2013 ESH/ESC guidelines for the management of arterial hypertension: the Task Force for the Management of Arterial Hypertension of the European Society of Hypertension (ESH) and of the European Society of Cardiology (ESC). *Eur Heart J*. 2013 Jul 14;34(28):2159–219.
7. James PA, Oparil S, Carter BL, Cushman WC, Dennison-Himmelfarb C, Handler J, et al. Evidence-Based Guideline for the Management of High Blood Pressure in Adults. *Jama*. 2013;1097(5):1–14.
8. Pickering TG, Gerin W, Schwartz AR. What is the white-coat effect and how should it be measured? *Blood Press Monit*. 2002;7(6):329–33.
9. Birkett NJ. The effect of alternative criteria for hypertension on estimates of prevalence and control. *J Hypertens*. 1997;15:237–44.
10. McAlister FA, Straus SE. Evidence based treatment of hypertension: Measurement of blood pressure: an evidence based review. *BMJ*. 2001;322(7291):908–11.
11. Carey IM, Nightingale CM, DeWilde S, Harris T, Whincup PH, Cook DG. Blood pressure recording bias during a period when the Quality and Outcomes Framework was introduced. *J Hum Hypertens*. 2009 Nov 12;23(11):764–70.
12. Doran T, Fullwood C, Gravelle H, Reeves D, Kontopantelis E, Hiroeh U, et al. Pay-for-performance programs in family practices in the United Kingdom. *N Engl J Med*. 2006 Jul 27;355(4):375–84.
13. Schiffrin EL, Calhoun DA, Flack JM. Do We Need a New Definition of Hypertension After SPRINT? *Am J Hypertens*. 2016 Oct;29(10):1127–9.
14. Hippisley-Cox J, Coupland C, Vinogradova Y, Robson J, Minhas R, Sheikh A, et al. Predicting cardiovascular risk in England and Wales: prospective derivation and validation of QRISK2. *BMJ*. 2008;336(7659):1475–82.
15. Heneghan C, Perera R, Mant D, Glasziou P. Hypertension guideline recommendations in general practice: awareness, agreement, adoption, and adherence. *Br J Gen Pract*. 2007 Dec;57(545):948–52.

16. Meneton P, Ricordeau P, Weill A, Tuppin P, Samson S, Allemand H, et al. Evaluation of the agreement between guidelines and initial antihypertensive drug treatment using a national health care reimbursement database. *J Eval Clin Pract*. 2012 Jun;18(3):623–9.
17. Khatib R, Schwalm J-D, Yusuf S, Haynes RB, McKee M, Khan M, et al. Patient and healthcare provider barriers to hypertension awareness, treatment and follow up: a systematic review and meta-analysis of qualitative and quantitative studies. *PLoS One*. 2014 Jan 15;9(1):e84238.
18. Bartlett JE, Kotrlik JW, Higgins CC. Organizational Research: Determining Appropriate Sample Size in Survey Research. *Inf Technol Learn Perform J*. 2001;19(1).
19. StataCorp. *Stata Statistical Software: Release 14*. College Station, Texas, USA: StataCorp LP; 2015.
20. R Core Team. *R: A language and environment for statistical computing*. R Foundation for Statistical Computing, Vienna, Austria; 2016.
21. Office for National Statistics. *Internet users in the UK : 2016*. 2016.
22. Stamler J, Vaccaro O, Neaton JD, Wentworth D. Diabetes, Other Risk Factors, and 12-Yr Cardiovascular Mortality for Men Screened in clusively of people with the Multiple Risk Factor Intervention Trial. *Diabetes Care*. 1993;16(2):434–44.
23. Keenan K, Hayen A, Neal BC, Irwig L. Long term monitoring in patients receiving treatment to lower blood pressure: analysis of data from placebo controlled randomised controlled trial. *BMJ*. 2009;338.
24. Kaczorowski J, Myers MG, Gelfer M, Dawes M, Mang EJ, Berg A, et al. How do family physicians measure blood pressure in routine clinical practice? *Can Fam Physician*. 2017;63(3).
25. Leung AA, Nerenberg K, Daskalopoulou SS, McBrien K, Zarnke KB, Dasgupta K, et al. Hypertension Canada's 2016 Canadian Hypertension Education Program Guidelines for Blood Pressure Measurement, Diagnosis, Assessment of Risk, Prevention, and Treatment of Hypertension. *Can J Cardiol*. 2016;32(5):569–88.
26. Mejzner N, Clark CE, Smith LF, Campbell JL. Trends in the diagnosis and management of hypertension: repeated primary care survey in South West England. *Br J Gen Pract*. 2017;67(658).
27. Sheppard JP, Fletcher B, Gill P, Martin U, Roberts N, McManus RJ. Predictors of the Home-Clinic Blood Pressure Difference: A Systematic Review and Meta-Analysis. *Am J Hypertens*. 2016 May;29(5):614–25.
28. Sheppard JP, Stevens R, Gill P, Martin U, Godwin M, Hanley J, et al. Predicting Out-of-Office Blood Pressure in the Clinic (PROOF-BP). *Hypertension*. 2016 May;67(5):941–50.
29. Clark CE, Taylor RS, Shore AC, Ukoumunne OC, Campbell JL. Association of a difference in systolic blood pressure between arms with vascular disease and mortality: a systematic review and meta-analysis. *Lancet*. 2012 Mar 10;379(9819):905–14.
30. A'Court C, Sheppard J, Greenhalgh T. Blood pressure measurement: a call to arms. *Br J Gen Pract*. 2016;66(652).

1  
2  
3  
4  
5  
6  
7  
8  
9  
10  
11  
12  
13  
14  
15  
16  
17  
18  
19  
20  
21  
22  
23  
24  
25  
26  
27  
28  
29  
30  
31  
32  
33  
34  
35  
36  
37  
38  
39  
40  
41  
42  
43  
44  
45  
46  
47  
48  
49  
50  
51  
52  
53  
54  
55  
56  
57  
58  
59  
60

For peer review only

**Table 1: Characteristics of participants completing the prospective survey with and without diabetes**

|                                 |                                    | <b>Participants with diabetes<br/>(N=279)</b> | <b>Participants without diabetes<br/>(N=55)</b> |
|---------------------------------|------------------------------------|-----------------------------------------------|-------------------------------------------------|
| <b>Characteristic</b>           |                                    | Mean (SD) / N (%)                             | Mean (SD) / N (%)                               |
| <b>Male</b>                     |                                    | 157 (56.3)                                    | 15 (27.3)                                       |
| <b>Age</b>                      |                                    | 59.0 (12.1)                                   | 60.3 (12.7)                                     |
| <b>Current smoker</b>           |                                    | 21 (7.5)                                      | 4 (7.3)                                         |
| <b>Hypertensive</b>             |                                    | 159 (57.0)                                    | 41 (74.6)                                       |
|                                 | <b>Antihypertensive medication</b> | 141 (88.7)                                    | 32 (78.0)                                       |
| <b>Previous CVD</b>             |                                    | 29 (10.4)                                     | 2 (3.6)                                         |
| <b>Chronic kidney disease</b>   |                                    | 11 (3.9)                                      | 1 (1.8)                                         |
| <b>Rheumatoid arthritis</b>     |                                    | 12 (4.3)                                      | 1 (1.8)                                         |
| <b>Told at high risk of CVD</b> |                                    | 26 (9.3)                                      | 4 (7.3)                                         |
| <b>Region</b>                   |                                    |                                               |                                                 |
|                                 | <b>North East</b>                  | 9 (3.2)                                       | 0 (0.0)                                         |
|                                 | <b>North West</b>                  | 111 (39.8)                                    | 14 (25.5)                                       |
|                                 | <b>Yorkshire &amp; The Humber</b>  | 19 (6.8)                                      | 1 (1.8)                                         |
|                                 | <b>East Midlands</b>               | 6 (2.2)                                       | 2 (3.6)                                         |
|                                 | <b>West Midlands</b>               | 13 (4.7)                                      | 3 (5.5)                                         |
|                                 | <b>East of England</b>             | 22 (7.9)                                      | 6 (10.9)                                        |
|                                 | <b>South West</b>                  | 40 (14.3)                                     | 9 (16.4)                                        |
|                                 | <b>South East</b>                  | 42 (15.1)                                     | 15 (27.3)                                       |
|                                 | <b>London</b>                      | 13 (4.7)                                      | 2 (3.6)                                         |
|                                 | <b>Other</b>                       | 0 (0.0)                                       | 2 (3.6)                                         |
|                                 | <b>Unknown</b>                     | 4 (1.4)                                       | 1 (1.8)                                         |

**Table 2: Likelihood of having BP measured multiple times or being asked to monitor BP at home, according to patient and practitioner characteristics (stratified by diabetes status)**

|                                                                        | Likelihood of multiple BP measurements<br>(n (%) in each group)<br>(difference [95% confidence interval]) | Likelihood of being asked to monitor BP at home<br>(n (%) in each group)<br>(difference [95% confidence interval]) |
|------------------------------------------------------------------------|-----------------------------------------------------------------------------------------------------------|--------------------------------------------------------------------------------------------------------------------|
| In participants with diabetes                                          |                                                                                                           |                                                                                                                    |
| If the participant was hypertensive vs. normotensive                   | 46/103 (44.7%) vs. 28/80 (35.0%)<br>difference = 9.7% [-4.5 to 23.9%]                                     | 24/159 (15.1%) vs. 13/120 (10.8%)<br>difference=4.3% [-3.6 to 12.1%]                                               |
| If the participant had treated hypertension vs. untreated hypertension | 40/93 (43.0%) vs. 6/10 (60.0%)<br>difference = -17.0% [-49.0 to 15.0%]                                    | 22/141 (15.6%) vs. 2/18 (11.1%)<br>difference = 4.5% [-11.2 to 20.2%]                                              |
| If BP was measured by a GP vs. a nurse                                 | 16/38 (42.1%) vs. 56/139 (40.3%)<br>difference = 1.8% [-15.9 to 19.5%]                                    | 11/38 (28.9%) vs. 15/139 (10.8%)<br>difference = 18.2% [2.8 to 33.5%]                                              |
| In participants without diabetes                                       |                                                                                                           |                                                                                                                    |
| If the participant was hypertensive vs. normotensive                   | 2/6 (33.3%) vs. 9/28 (32.1%)<br>difference = 1.2% [-40.3 to 42.7%]                                        | 14/41 (34.1%) vs. 0/14 (0.0%)<br>difference = 34.1% [19.6 to 48.7%]                                                |
| If the participant had treated hypertension vs. untreated hypertension | 8/23 (34.8%) vs. 1/5 (20.0%)<br>difference = 14.8% [-25.3 to 54.9%]                                       | 9/32 (28.1%) vs. 5/9 (55.6%)<br>difference = -27.4% [-63.4 to 8.6%]                                                |
| If BP was measured by a GP vs. a nurse                                 | 9/21 (42.9%) vs. 2/11 (18.2%)<br>difference = 24.7% [-6.4 to 55.8%]                                       | 7/21 (33.3%) vs. 4/11 (36.4%)<br>difference = -3.0% [-37.9 to 31.8%]                                               |

Fig. 1: Study flowchart

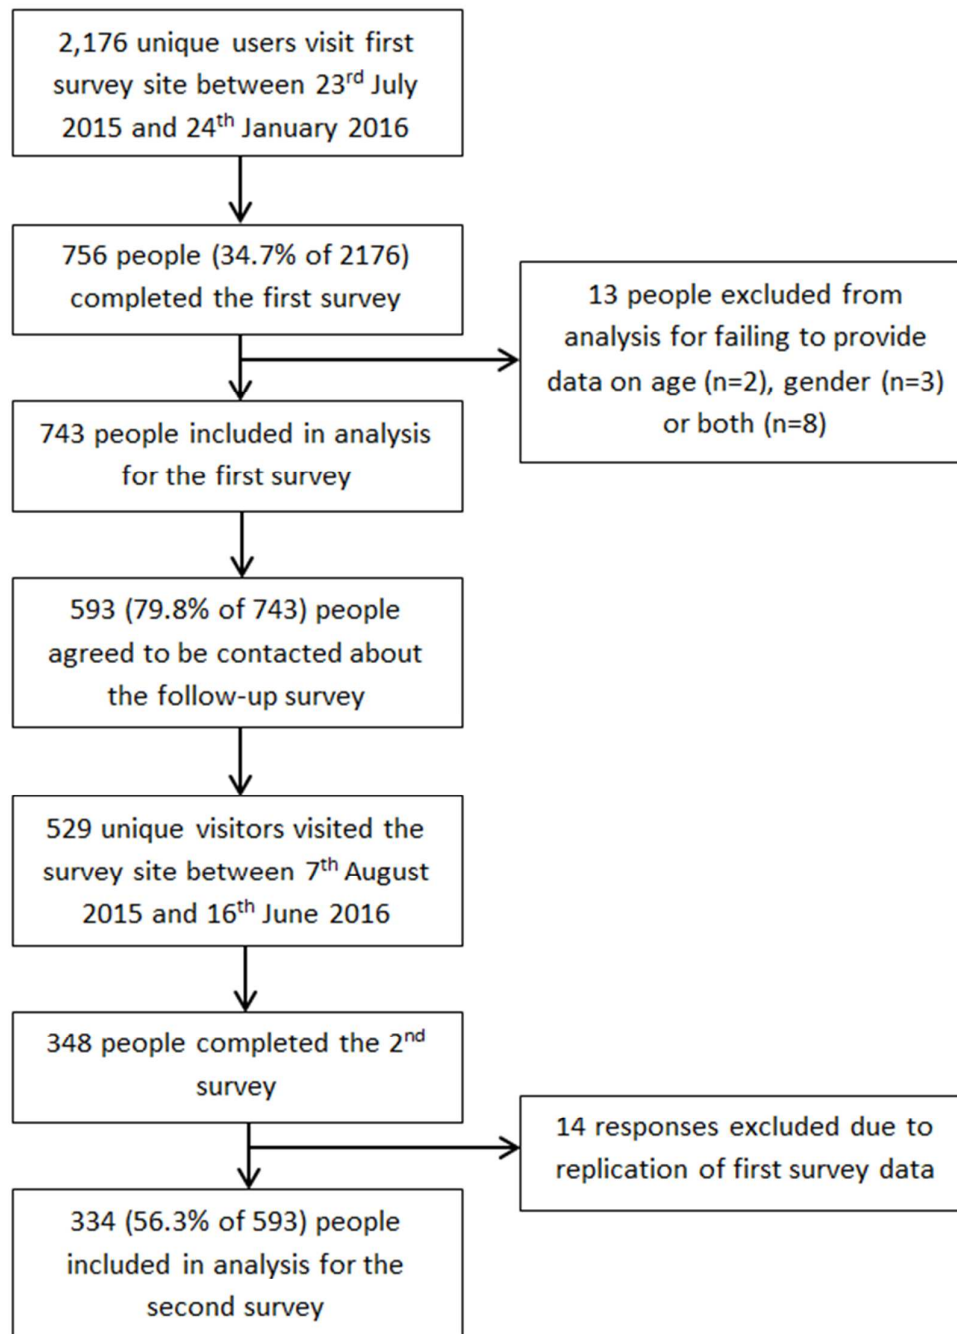



Fig.2: Mean blood pressure and 95% confidence intervals by reading number in 91 participants with diabetes who reported a value for each blood pressure reading in the prospective survey

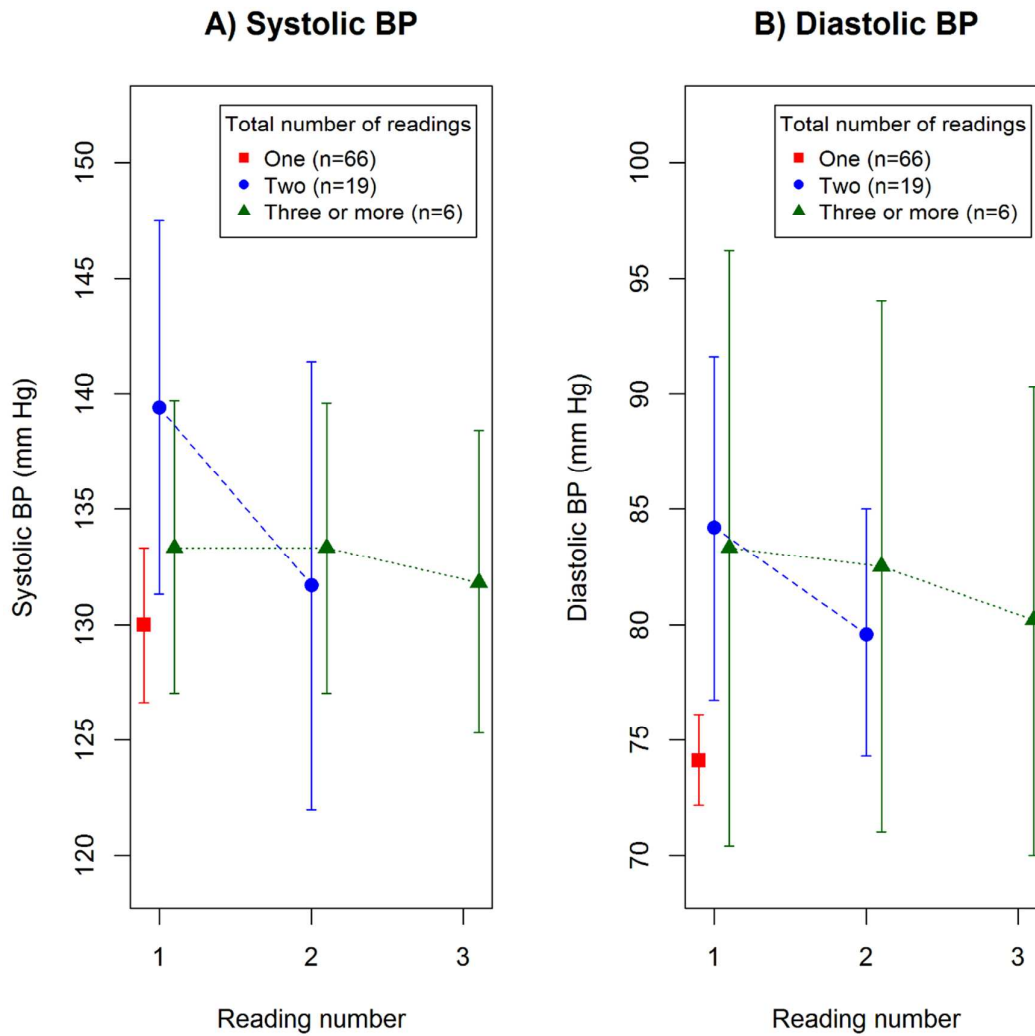

**Fig. 3: Mean blood pressure and 95% confidence intervals by reading number in 20 participants without diabetes who reported a value for each blood pressure reading in the prospective survey**

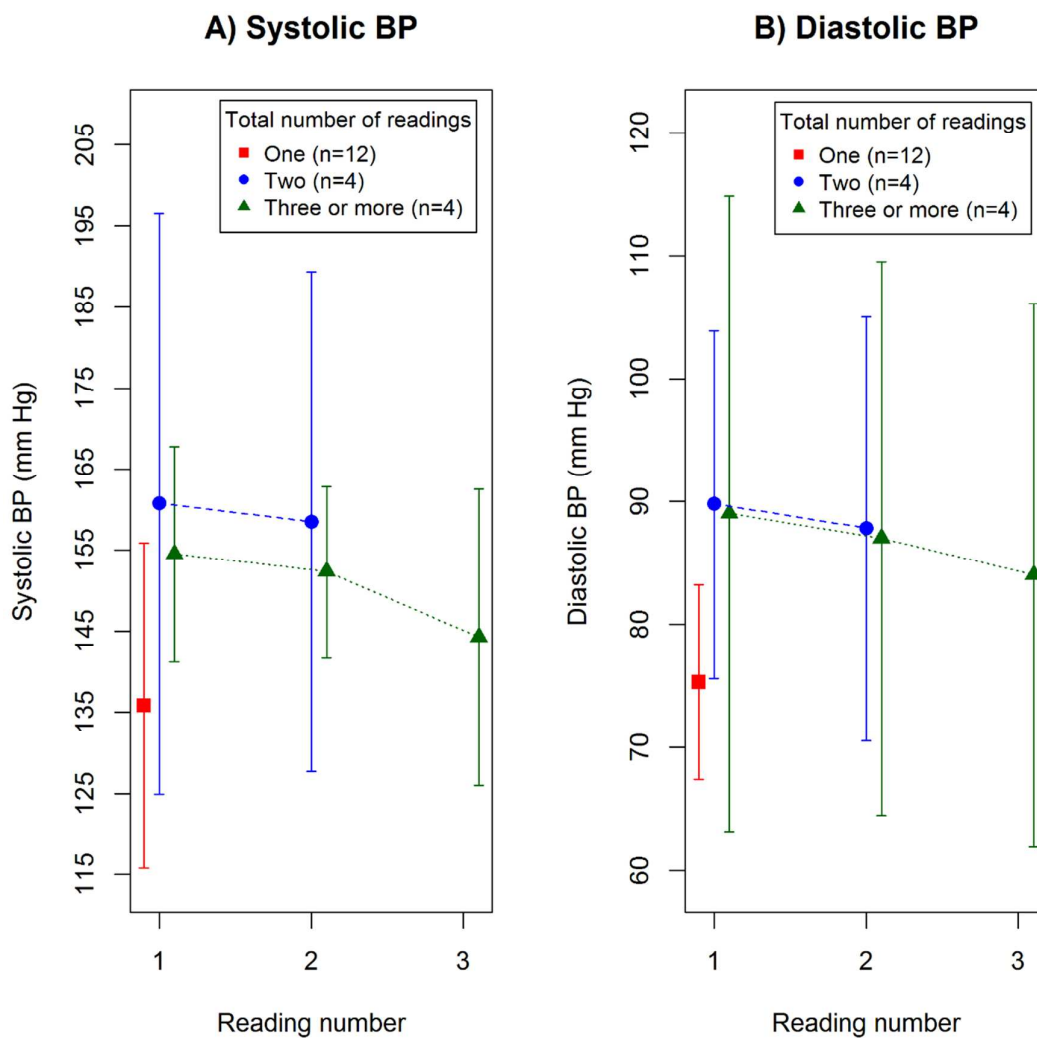

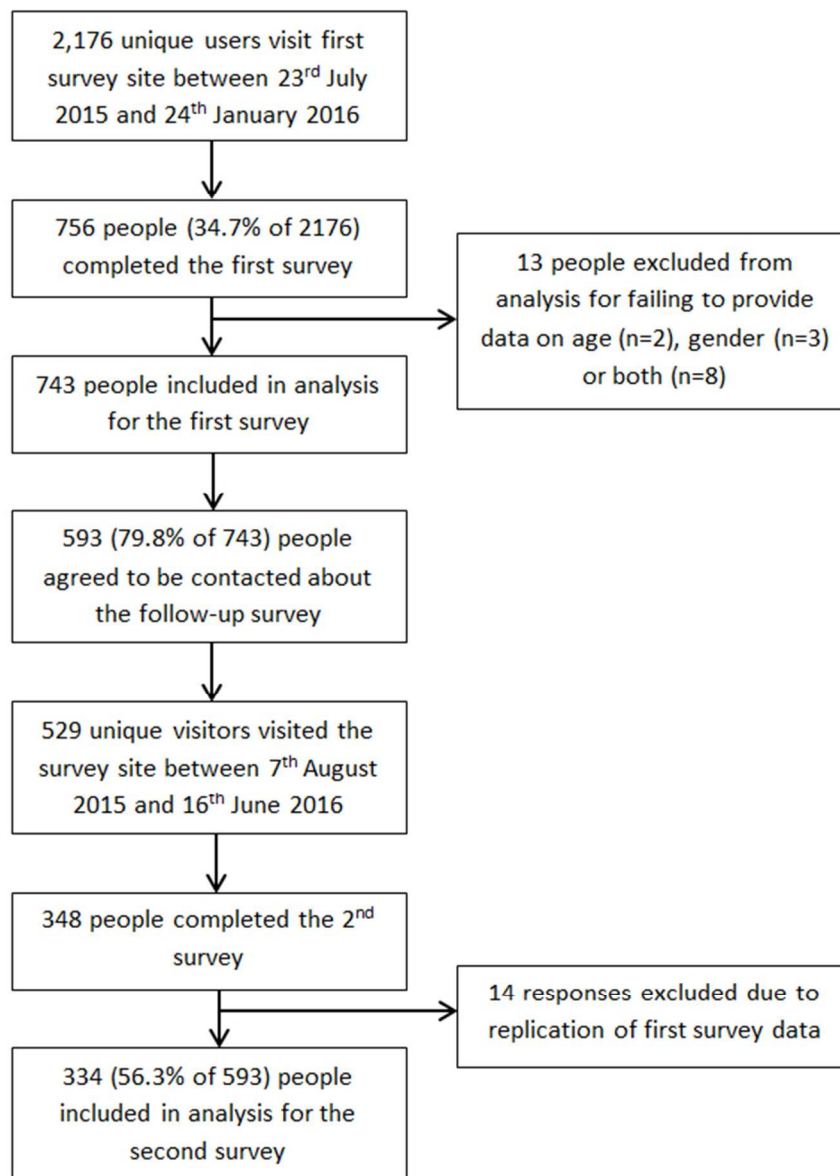

Fig. 1: Study flowchart

175x212mm (96 x 96 DPI)

1  
2  
3  
4  
5  
6  
7  
8  
9  
10  
11  
12  
13  
14  
15  
16  
17  
18  
19  
20  
21  
22  
23  
24  
25  
26  
27  
28  
29  
30  
31  
32  
33  
34  
35  
36  
37  
38  
39  
40  
41  
42  
43  
44  
45  
46  
47  
48  
49  
50  
51  
52  
53  
54  
55  
56  
57  
58  
59  
60

**A) Systolic BP**

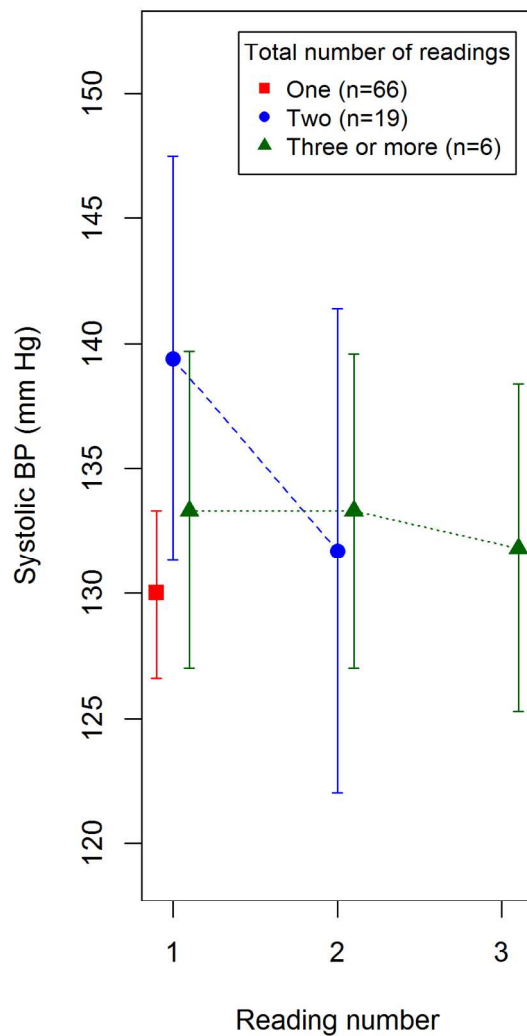

Fig.2: Mean blood pressure and 95% confidence intervals by reading number in 91 participants with diabetes who reported a value for each blood pressure reading in the prospective survey

179x360mm (300 x 300 DPI)

**B) Diastolic BP**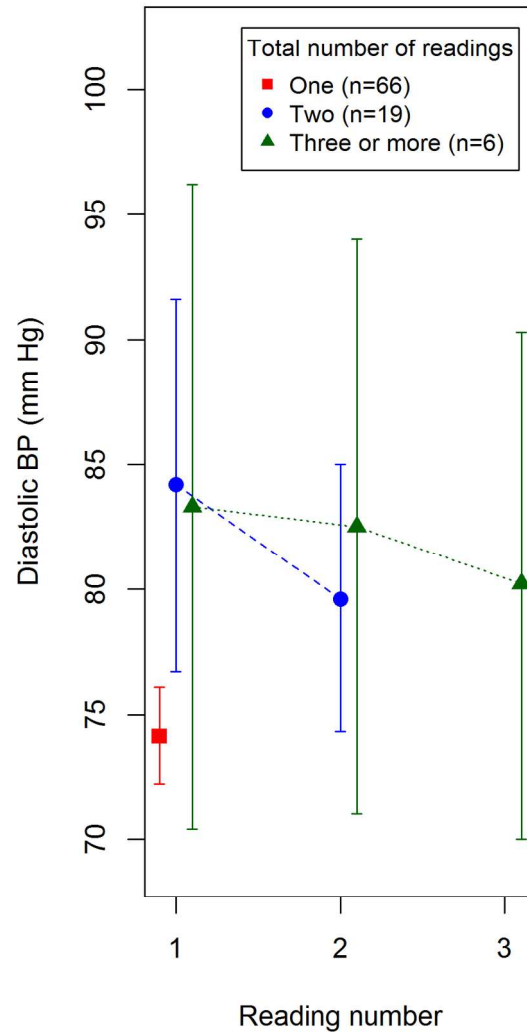

Fig.2: Mean blood pressure and 95% confidence intervals by reading number in 91 participants with diabetes who reported a value for each blood pressure reading in the prospective survey

179x360mm (300 x 300 DPI)

1  
2  
3  
4  
5  
6  
7  
8  
9  
10  
11  
12  
13  
14  
15  
16  
17  
18  
19  
20  
21  
22  
23  
24  
25  
26  
27  
28  
29  
30  
31  
32  
33  
34  
35  
36  
37  
38  
39  
40  
41  
42  
43  
44  
45  
46  
47  
48  
49  
50  
51  
52  
53  
54  
55  
56  
57  
58  
59  
60

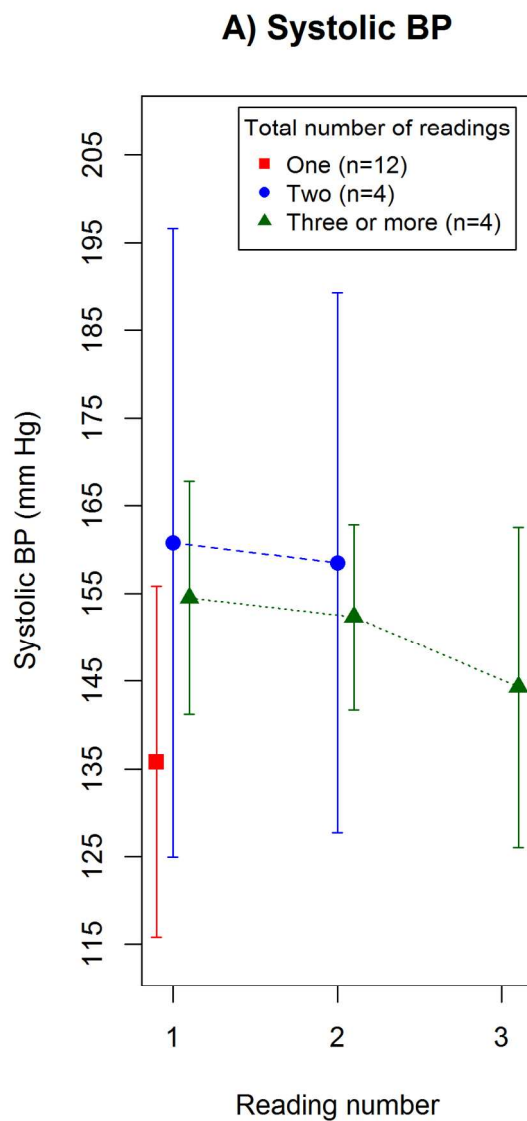

Fig. 3: Mean blood pressure and 95% confidence intervals by reading number in 20 participants without diabetes who reported a value for each blood pressure reading in the prospective survey

179x360mm (300 x 300 DPI)

**B) Diastolic BP**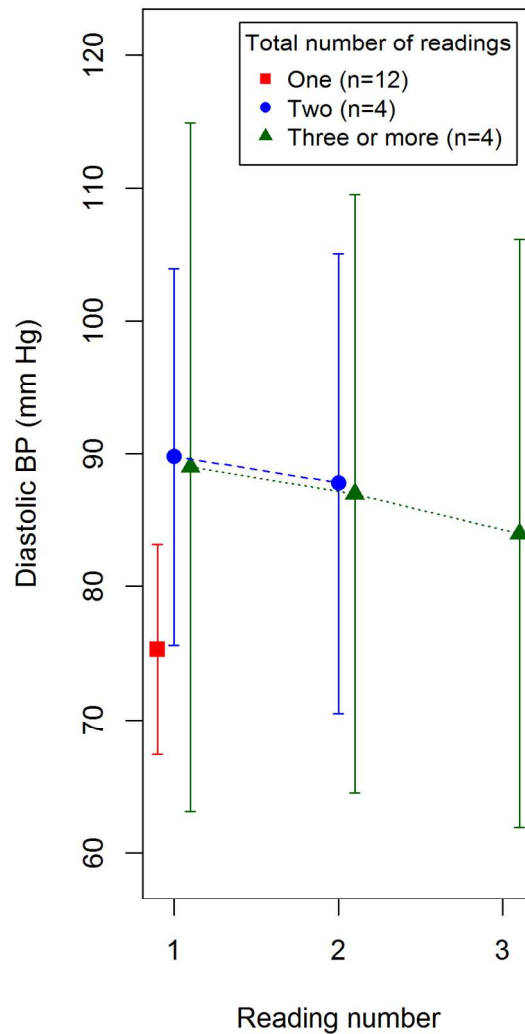

Fig. 3: Mean blood pressure and 95% confidence intervals by reading number in 20 participants without diabetes who reported a value for each blood pressure reading in the prospective survey

179x360mm (300 x 300 DPI)

## Supplementary material

### Initial survey

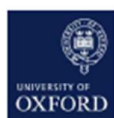

NUFFIELD DEPARTMENT OF  
**PRIMARY CARE**  
HEALTH SCIENCES

Nuffield Department of Primary Care Health Sciences • University of Oxford •  
New Radcliffe House • Radcliffe Observatory Quarter • Woodstock Road •  
Oxford OX2 6GG • [www.phc.ox.ac.uk](http://www.phc.ox.ac.uk)

Sarah Stevens  
+44 (0)1865 289449 • [sarah.stevens@phc.ox.ac.uk](mailto:sarah.stevens@phc.ox.ac.uk)

#### Survey of blood pressure measurement in primary care (Survey 1)

- Q1 Have you got high blood pressure or have you ever been told by your GP that you have high blood pressure?
- Yes. Go to Q2
  - No. Go to Q3
- Q2 Do you take any medication for your high blood pressure?
- Yes
  - No
- Q3 When was your last appointment with a GP or practice nurse at your general practice surgery?
- In the last week
  - In the last month
  - In the last 6 months
  - In the last year
  - More than a year ago
  - Can't remember
- Q4 Who was your last appointment at the surgery with?
- GP
  - Nurse
  - Can't remember
- Q5 Was your blood pressure measured during your last appointment?
- Yes, by a GP. Go to Q6
  - Yes, by a nurse. Go to Q6
  - Yes, by yourself in the waiting room. Go to Q6.
  - No. Go to Q9
  - Can't remember
- Q6 How many times was your blood pressure measured during the appointment? Count one measurement for each time the cuff on your arm went up.
- Once
  - Twice
  - Three times
  - Four or more times
  - Can't remember
- Q7 Did your GP/ nurse tell you your blood pressure reading or discuss it with you?
- Yes
  - No
  - Can't remember
- Q8 Do you know your blood pressure reading from the appointment?
- Yes. Go to Q9
  - No. Go to Q10
  - Wasn't told. Go to Q10
  - Can't remember. Go to Q10



- 1  
2  
3 Q9 What was your blood pressure reading during the appointment?  
4 (Your blood pressure consists of two numbers: systolic pressure and diastolic pressure. Systolic pressure is always the  
5 larger of the two numbers. For example if your blood pressure was 130/80 mmHg, 130 is the systolic reading and 80 is  
6 the diastolic reading.)  
7                      Systolic                      Diastolic  
8                      \_\_\_\_\_                      \_\_\_\_\_  
9  
10 Q10 During your last appointment, were you asked to measure your blood pressure yourself away from the practice e.g. at  
11 home?  
12                       Yes  
13                       No  
14                       Can't remember  
15  
16 Q11 Have you ever had your blood pressure measured on both arms at the same appointment?  
17                       Yes  
18                       No  
19                       Can't remember  
20  
21 Q12 Are you  
22                       Male  
23                       Female  
24  
25 Q13 How old are you? \_\_\_\_\_ years  
26  
27 Q14 Do you currently smoke?  
28                       Yes  
29                       No  
30  
31 Q15 Do you take any medication for high cholesterol e.g. statins?  
32                       Yes  
33                       No  
34  
35 Q16 Have you ever been told by your GP that you have had any of the following conditions or a chronic condition?  
36 (Tick all that apply)  
37                       Diabetes (Type 1 or Type 2)  
38                       Chronic kidney disease  
39                       Stroke  
40                       Heart attack  
41                       Irregular heart beat (atrial fibrillation)  
42                       Rheumatoid arthritis  
43                       At high risk of having a heart attack or stroke  
44                       Other. Please specify \_\_\_\_\_  
45                       None of the above  
46  
47 Q17 How did you hear about this survey?  
48                       University of the Third Age  
49                       Blood Pressure UK  
50                       Other. Please specify \_\_\_\_\_  
51  
52 Q18 Please provide the first half of your postcode (e.g. ME19 4SH would be ME19. This will be used to analyse results by area  
53 only)  
54 \_\_\_\_\_  
55  
56  
57  
58  
59  
60

- 1  
2  
3 Q19 When do you expect your next appointment with your GP or nurse at your general practice surgery to be (confirmed or  
4 possible)?  
5  In the next week  
6  In the next two weeks  
7  In the next month  
8  In the next 3 months  
9  Don't know  
10  None scheduled
- 11 Q20 Would you be prepared to take part in a short (5 minute) follow-on survey after your next appointment?  
12 (The follow-on survey will ask further, similar questions about whether and how your blood pressure was measured at  
13 the appointment. This will include how many times your blood pressure was measured and what the level of your blood  
14 pressure was.)  
15  Yes (Go to Q21)  
16  No (END)
- 17 Q21 In order to take part in the follow-on survey, the researcher will need to contact you by email and needs your consent to  
18 do this. Please complete the following participant declaration:  
19 a) I have read the study information above, had the opportunity to ask questions and have received  
20 satisfactory answers (Q1 of 8)  
21  Yes  
22 b) I understand that this project has been reviewed by, and received ethics clearance through, the  
23 University of Oxford Central University Research Ethics Committee (Q2 of 8)  
24  Yes  
25 c) I understand that my participation is voluntary and I am free to withdraw myself and my data at any  
26 time, without giving any reason, and without any adverse consequences (Q3 of 8)  
27  Yes  
28 d) I understand who will have access to personal data provided (Q4 of 8)  
29  Yes  
30 e) I understand that personal data will be stored according to the Data Protection Act and will only be  
31 accessed by researchers from the Nuffield Department of Primary Care Health Sciences, University of Oxford (Q5 of 8)  
32  Yes  
33 f) I understand that the research will be written up and published peer-reviewed journals, presented at  
34 research meetings and published online as part of a student thesis, deposited both in print and online in the  
35 University of Oxford archives (Q6 of 8)  
36  Yes  
37 g) I understand how to raise concerns or make a complaint (Q7 of 8)  
38  Yes  
39 h) I agree to take part in the study (Q8 of 8)  
40  Yes  
41 i) Please enter your email address (This will only be used to contact you via email)  
42 \_\_\_\_\_

43  
44  
45  
46  
47  
48  
49  
50  
51  
52  
53  
54  
55  
56  
57  
58  
59  
60  
Thank you for taking the time to complete this survey.

## Prospective follow-up survey

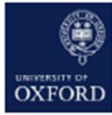

NUFFIELD DEPARTMENT OF  
**PRIMARY CARE**  
HEALTH SCIENCES

Nuffield Department of Primary Care Health Sciences • University of Oxford •  
New Radcliffe House • Radcliffe Observatory Quarter • Woodstock Road •  
Oxford OX2 6GG • www.phc.ox.ac.uk

Sarah Stevens  
+44 (0)1865 289449 • sarah.stevens@phc.ox.ac.uk

### Survey of blood pressure measurement in primary care (Survey 2)

- Q1 Please enter your email address (the email address given in survey 1. This will be used to match your responses from both surveys.)  
Email address \_\_\_\_\_
- Q3 When was your last appointment with a GP or practice nurse at your general practice surgery?  
 In the last week  
 In the last month  
 In the last 6 months  
 In the last year  
 More than a year ago  
 Can't remember
- Q4 Who was your last appointment at the surgery with?  
 GP  
 Nurse  
 Can't remember
- Q5 Was your blood pressure measured during your last appointment?  
 Yes, by a GP. Go to Q6  
 Yes, by a nurse. Go to Q6  
 Yes, by yourself in the waiting room. Go to Q6.  
 No. Go to Q9  
 Can't remember
- Q6 How many times was your blood pressure measured during the appointment? Count one measurement for each time the cuff on your arm went up.  
 Once  
 Twice  
 Three times  
 Four or more times  
 Can't remember
- Q7 Did your GP/ nurse tell you your blood pressure level or discuss it with you?  
 Yes  
 No  
 Can't remember
- Q8 Do you know your blood pressure reading from the appointment?  
 Yes. Go to Q9  
 No. Go to Q10  
 Wasn't told. Go to Q10  
 Can't remember. Go to Q10
- Q9 What was your blood pressure reading during the appointment?  
(Your blood pressure consists of two numbers: systolic pressure and diastolic pressure. Systolic pressure is always the larger of the two numbers. For example if your blood pressure was 130/80 mmHg, 130 is the systolic reading and 80 is the diastolic reading.)
- |                    | Systolic | Diastolic |
|--------------------|----------|-----------|
| First measurement  | _____    | _____     |
| Second measurement | _____    | _____     |
| Third measurement  | _____    | _____     |

1  
2  
3 Q10 During your last appointment, were you asked to measure your blood pressure yourself away from the practice e.g. at  
4 home?

- 5  Yes  
6  No  
7  Can't remember

8 Thank you for taking the time to complete this survey.  
9  
10  
11  
12  
13  
14  
15  
16  
17  
18  
19  
20  
21  
22  
23  
24  
25  
26  
27  
28  
29  
30  
31  
32  
33  
34  
35  
36  
37  
38  
39  
40  
41  
42  
43  
44  
45  
46  
47  
48  
49  
50  
51  
52  
53  
54  
55  
56  
57  
58  
59  
60

**Table S1: Characteristics of participants completing initial and follow-up surveys**

|                                        | <b>Completed 1st survey<br/>(N=743)</b> | <b>Completed prospective<br/>survey (N=334)</b> |
|----------------------------------------|-----------------------------------------|-------------------------------------------------|
| <b>Characteristic</b>                  | Mean (SD) / N (%)                       | Mean (SD) / N (%)                               |
| <b>Male</b>                            | 377 (50.7)                              | 172 (51.5)                                      |
| <b>Age</b>                             | 57.4 (13.28)                            | 59.3 (12.14)                                    |
| <b>Current smoker</b>                  | 48 (6.5)                                | 25 (7.5)                                        |
| <b>Hypertensive</b>                    | 413 (55.6)                              | 200 (59.9)                                      |
| <b>Antihypertensive<br/>medication</b> | 353 (85.5)                              | 173 (86.5)                                      |
| <b>Diabetes</b>                        | 623 (83.9)                              | 279 (83.5)                                      |
| <b>Previous CVD</b>                    | 62 (8.3)                                | 31 (9.3)                                        |
| <b>Chronic kidney disease</b>          | 25 (3.4)                                | 12 (3.6)                                        |
| <b>Rheumatoid arthritis</b>            | 23 (3.1)                                | 13 (3.9)                                        |
| <b>Told at high risk of CVD</b>        | 55 (7.4)                                | 30 (9.0)                                        |
| <b>Region</b>                          |                                         |                                                 |
| <b>North East</b>                      | 18 (2.4)                                | 9 (2.7)                                         |
| <b>North West</b>                      | 285 (38.4)                              | 125 (37.4)                                      |
| <b>Yorkshire &amp; The Humber</b>      | 55 (7.4)                                | 20 (6.0)                                        |
| <b>East Midlands</b>                   | 23 (3.1)                                | 8 (2.4)                                         |
| <b>West Midlands</b>                   | 38 (5.1)                                | 16 (4.8)                                        |
| <b>East of England</b>                 | 42 (5.7)                                | 28 (8.4)                                        |
| <b>South West</b>                      | 103 (13.9)                              | 49 (14.7)                                       |
| <b>South East</b>                      | 93 (12.5)                               | 57 (17.1)                                       |
| <b>London</b>                          | 50 (6.7)                                | 15 (4.5)                                        |
| <b>Other</b>                           | 8 (1.1)                                 | 2 (0.6)                                         |
| <b>Unknown</b>                         | 28 (3.8)                                | 5 (1.5)                                         |

**Table S2: Participant blood pressure (BP) measurement at their last general practice appointment in those with or without diabetes (initial survey results)**

|                                                             | <b>Participants with diabetes<br/>(N=623)</b> | <b>Participants without diabetes<br/>(N=120)</b> |
|-------------------------------------------------------------|-----------------------------------------------|--------------------------------------------------|
| <b>Did not have their BP<br/>measured</b>                   | 209 (33.6%)                                   | 45 (37.5%)                                       |
| <b>Had their BP measured by a GP</b>                        | 119 (19.1%)                                   | 37 (30.8%)                                       |
| <b>Had their BP measured by a<br/>nurse</b>                 | 286 (45.9%)                                   | 35 (29.2%)                                       |
| <b>Measured their BP themselves<br/>in the waiting room</b> | 9 (1.4%)                                      | 3 (2.5%)                                         |

**Table S3: Number of blood pressure measurements taken in participants with and without diabetes who could recall how many BP readings were taken (initial survey results)**

| Number of blood pressure measurements | Number of participants with diabetes (N=408) | Number of participants without diabetes (N=72) |
|---------------------------------------|----------------------------------------------|------------------------------------------------|
| 1                                     | 250 (61.3%)                                  | 36 (50.0%)                                     |
| 2                                     | 124 (30.4%)                                  | 20 (27.8%)                                     |
| 3 or more                             | 34 (8.3)                                     | 16 (22.2%)                                     |

**Table S4: Blood pressure values by reading number and total number of readings in 91 participants with diabetes who reported a value for each blood pressure reading in the prospective survey**

|                  | Total number of readings | Mean (95% CI) [Range]                |                                      |                                      |
|------------------|--------------------------|--------------------------------------|--------------------------------------|--------------------------------------|
|                  |                          | Reading number                       |                                      |                                      |
|                  |                          | 1                                    | 2                                    | 3                                    |
| <b>Systolic</b>  | <b>1 (n=66)</b>          | 130.0 (126.6 to 133.3)<br>[110,176]  | -                                    | -                                    |
|                  | <b>2 (n=19)</b>          | 139.4 (131.3 to 147.5)<br>[100,173]  | 131.7 (122.0 to 141.4)<br>[80, 173]  | -                                    |
|                  | <b>3 (n=6)</b>           | 133.3 (127.0 to 139.7)<br>[126, 140] | 133.3 (127.0 to 139.6)<br>[126, 140] | 131.8 (125.3 to 138.4)<br>[121, 139] |
| <b>Diastolic</b> | <b>1 (n=66)</b>          | 74.1 (72.2 to 76.1)<br>[60, 95]      | -                                    | -                                    |
|                  | <b>2 (n=19)</b>          | 84.2 (76.7 to 91.6)<br>[65, 133]     | 79.6 (74.3 to 85.0)<br>[62, 112]     | -                                    |
|                  | <b>3 (n=6)</b>           | 83.3 (70.4 to 96.2)<br>[66, 96]      | 82.5 (71.0 to 94.0)<br>[69, 94]      | 80.2 (70.0 to 90.3)<br>[68, 91]      |

**Table S5: Blood pressure values by reading number and total number of readings in 20 participants without diabetes reporting a value for all blood pressure readings in the prospective survey.**

|                  | Total number of readings | Mean (95% CI) [Range]                |                                      |                                      |
|------------------|--------------------------|--------------------------------------|--------------------------------------|--------------------------------------|
|                  |                          | Reading number                       |                                      |                                      |
|                  |                          | 1                                    | 2                                    | 3                                    |
| <b>Systolic</b>  | <b>1 (n=12)</b>          | 135.8 (115.8 to 155.8)<br>[110, 213] | -                                    | -                                    |
|                  | <b>2 (n=4)</b>           | 160.8 (124.9 to 196.6)<br>[137, 181] | 158.5 (127.7 to 189.3)<br>[137, 179] | -                                    |
|                  | <b>3 (n=4)</b>           | 154.5 (141.2 to 167.8)<br>[147, 166] | 152.3 (141.7 to 162.8)<br>[147, 162] | 144.3 (126.0 to 162.5)<br>[128, 155] |
| <b>Diastolic</b> | <b>1 (n=12)</b>          | 75.3 (67.3 to 83.2)<br>[60, 100]     | -                                    | -                                    |
|                  | <b>2 (n=4)</b>           | 89.8 (75.6 to 103.9)<br>[78, 98]     | 87.8 (70.5 to 105.0)<br>[78, 99]     | -                                    |
|                  | <b>3 (n=4)</b>           | 89.0 (63.1 to 114.9)<br>[70, 108]    | 87.0 (64.5 to 109.5)<br>[69, 101]    | 84.0 (61.9 to 106.1)<br>[65, 97]     |

**Table S6: Blood pressure measurement by diabetes status in a random sample of respondents from unique postcode districts**

|                                    | <b>Participants with diabetes</b><br>BP was measured in = 108/171<br>participants: 22 (20.4%) by a GP, 81 (75%) by a nurse and 5 (4.6%) by the patient |                                           | <b>Participants without diabetes</b><br>BP was measured in = 24/41<br>participants: 15 (62.5%) by a GP, 7 (29.2%) by a nurse and 2 (8.3%) by the patient |                                           |
|------------------------------------|--------------------------------------------------------------------------------------------------------------------------------------------------------|-------------------------------------------|----------------------------------------------------------------------------------------------------------------------------------------------------------|-------------------------------------------|
| <b>Number of times BP measured</b> | <b>N (%)</b>                                                                                                                                           | <b>Asked to measure BP at home (N, %)</b> | <b>N (%)</b>                                                                                                                                             | <b>Asked to measure BP at home (N, %)</b> |
| <b>Once</b>                        | 58 (53.7%)                                                                                                                                             | 6 (10.3%)                                 | 17 (70.8%)                                                                                                                                               | 3 (17.6%)                                 |
| <b>Twice</b>                       | 34 (31.5%)                                                                                                                                             | 7 (20.6%)                                 | 2 (8.3%)                                                                                                                                                 | 2 (100.0%)                                |
| <b>Three or more</b>               | 16 (14.8%)                                                                                                                                             | 5 (31.3%)                                 | 5 (20.8%)                                                                                                                                                | 3 (60.0%)                                 |

**Table S7: Blood pressure values by reading number and total number of readings in a random sample of respondents from unique postcode districts (stratified by diabetes status, in those reporting all BP readings)**

|                                                                                                                          | <b>Total number of readings</b> | <b>Mean (SD)</b>      |              |              |
|--------------------------------------------------------------------------------------------------------------------------|---------------------------------|-----------------------|--------------|--------------|
|                                                                                                                          |                                 | <b>Reading number</b> |              |              |
|                                                                                                                          |                                 | <b>1</b>              | <b>2</b>     | <b>3</b>     |
| <b>Participants with diabetes reporting all BP readings (N=49; 31 (63.3%) had BP measured according to guidelines)</b>   |                                 |                       |              |              |
| <b>Systolic</b>                                                                                                          | <b>1 (n=35)</b>                 | 128.0 (16.3)          | -            | -            |
|                                                                                                                          | <b>2 (n=10)</b>                 | 135.1 (11.8)          | 125.1 (19.3) | -            |
|                                                                                                                          | <b>3 (n=4)</b>                  | 132.5 (6.5)           | 132.0 (6.5)  | 130.8 (7.7)  |
| <b>Diastolic</b>                                                                                                         | <b>1 (n=35)</b>                 | 75.8 (8.7)            | -            | -            |
|                                                                                                                          | <b>2 (n=10)</b>                 | 85.8 (19.1)           | 80.9 (13.6)  | -            |
|                                                                                                                          | <b>3 (n=4)</b>                  | 78.5 (12.3)           | 79.0 (11.7)  | 77.8 (10.8)  |
| <b>Participants without diabetes reporting all BP readings (N=15; 8 (53.3%) had BP measured according to guidelines)</b> |                                 |                       |              |              |
| <b>Systolic</b>                                                                                                          | <b>1 (n=9)</b>                  | 137.0 (36.8)          | -            | -            |
|                                                                                                                          | <b>2 (n=2)</b>                  | 163.5 (24.7)          | 159.0 (15.6) | -            |
|                                                                                                                          | <b>3 (n=4)</b>                  | 154.5 (8.3)           | 152.3 (6.6)  | 144.3 (11.5) |
| <b>Diastolic</b>                                                                                                         | <b>1 (n=9)</b>                  | 78.3 (12.8)           | -            | -            |
|                                                                                                                          | <b>2 (n=2)</b>                  | 93.0 (7.1)            | 89.0 (14.1)  | -            |
|                                                                                                                          | <b>3 (n=4)</b>                  | 89.0 (6.3)            | 87.0 (14.1)  | 84.0 (13.9)  |



**Table S8: Likelihood of having BP measured multiple times or being asked to monitor BP at home, according to patient and practitioner characteristics in patients with and without diabetes from in a random sample of responses from unique postcode districts**

|                                                                           | Likelihood of multiple BP measurements<br>(n (%) in each group)<br>(difference [95% confidence interval]) | Likelihood of being asked to monitor BP at home<br>(n (%) in each group)<br>(difference [95% confidence interval]) |
|---------------------------------------------------------------------------|-----------------------------------------------------------------------------------------------------------|--------------------------------------------------------------------------------------------------------------------|
| <b>In patients with diabetes</b>                                          |                                                                                                           |                                                                                                                    |
| <b>If the patient is hypertensive vs. normotensive</b>                    | 31/55 (56.4%) vs. 19/53 (35.9%)<br>difference = 20.5% [2.1 to 38.9%]                                      | 14/88 (15.9%) vs. 10/83 (12.1%)<br>difference = 3.9% [-6.5 to 14.2%]                                               |
| <b>If the patient has treated hypertension vs. untreated hypertension</b> | 27/48 (56.3%) vs. 4/7 (57.1%)<br>difference = 0.9% [-38.4 to 40.1%]                                       | 13/75 (17.3%) vs. 1/13 (7.7%)<br>difference = 9.6% [-7.2 to 26.5%]                                                 |
| <b>If BP was measured by a GP vs. a nurse</b>                             | 12/22 (54.5%) vs. 36/81 (44.4%)<br>difference = 10.1% [-13.4 to 33.6%]                                    | 7/22 (31.8%) vs. 9/81 (11.1%)<br>difference = 20.7% [0.1 to 41.3%]                                                 |
| <b>In patients without diabetes</b>                                       |                                                                                                           |                                                                                                                    |
| <b>If the patient is hypertensive vs. normotensive</b>                    | 6/19 (31.6%) vs. 1/5 (20.0%)<br>difference = 11.6% [-29.2 to 52.4%]                                       | 11/31 (35.5%) vs. 0/10 (0.0%)<br>difference = 35.5% [18.6% to 52.3%]                                               |
| <b>If the patient has treated hypertension vs. untreated hypertension</b> | 5/15 (33.3%) vs. 1/4 (25.0%)<br>difference = 8.3% [-40.3 to 57.0%]                                        | 7/23 (30.4%) vs. 4/8 (50.0%)<br>difference = 19.6% [-19.9 to 59.0%]                                                |
| <b>If BP was measured by a GP vs. a nurse</b>                             | 5/15 (33.3%) vs. 2/7 (28.6%)<br>difference = 4.8% [-36.3 to 45.9%]                                        | 6/15 (40.0%) vs. 2/7 (28.6%)<br>difference = 11.4% [-30.2 to 53.1%]                                                |

**Table S9: Blood pressure measurement by diabetes status, excluding possible duplicate submissions**

|                                    | <b>Participants with diabetes</b><br>BP was measured in = 172/263<br>participants: 36 (20.9%) by a GP, 130 (75.6%) by a nurse and 6 (3.5%) by the patient |                                           | <b>Participants without diabetes</b><br>BP was measured in = 33/54<br>participants: 21 (63.6%) by a GP, 10 (30.3%) by a nurse and 2 (6.1%) by the patient |                                           |
|------------------------------------|-----------------------------------------------------------------------------------------------------------------------------------------------------------|-------------------------------------------|-----------------------------------------------------------------------------------------------------------------------------------------------------------|-------------------------------------------|
| <b>Number of times BP measured</b> | <b>N (%)</b>                                                                                                                                              | <b>Asked to measure BP at home (N, %)</b> | <b>N (%)</b>                                                                                                                                              | <b>Asked to measure BP at home (N, %)</b> |
| <b>Once</b>                        | 100 (58.1%)                                                                                                                                               | 10 (10.0%)                                | 22 (66.6%)                                                                                                                                                | 5 (22.7%)                                 |
| <b>Twice</b>                       | 50 (29.1%)                                                                                                                                                | 11 (22.0%)                                | 5 (12.2%)                                                                                                                                                 | 3 (60.0%)                                 |
| <b>Three or more</b>               | 22 (12.8%)                                                                                                                                                | 7 (31.8%)                                 | 6 (18.2%)                                                                                                                                                 | 3 (50.0%)                                 |

**Table S10: Blood pressure values by reading number and total number of readings excluding possible duplicate submissions (stratified by diabetes status, in those reporting all BP readings)**

|                                                                                                                           | <b>Total number of readings</b> | <b>Mean (SD)</b>      |              |              |
|---------------------------------------------------------------------------------------------------------------------------|---------------------------------|-----------------------|--------------|--------------|
|                                                                                                                           |                                 | <b>Reading number</b> |              |              |
|                                                                                                                           |                                 | <b>1</b>              | <b>2</b>     | <b>3</b>     |
| <b>Participants with diabetes reporting all BP readings (N=91; 58 (63.7%) had BP measured according to guidelines)</b>    |                                 |                       |              |              |
| <b>Systolic</b>                                                                                                           | <b>1 (n=66)</b>                 | 130.0 (13.5)          | -            | -            |
|                                                                                                                           | <b>2 (n=19)</b>                 | 139.4 (16.8)          | 131.7 (20.1) | -            |
|                                                                                                                           | <b>3 (n=6)</b>                  | 133.3 (6.1)           | 133.3 (6.0)  | 131.8 (6.2)  |
| <b>Diastolic</b>                                                                                                          | <b>1 (n=66)</b>                 | 74.1 (7.9)            | -            | -            |
|                                                                                                                           | <b>2 (n=19)</b>                 | 84.2 (15.4)           | 79.6 (11.1)  | -            |
|                                                                                                                           | <b>3 (n=6)</b>                  | 83.3 (12.3)           | 82.5 (10.9)  | 80.2 (9.7)   |
| <b>Participants without diabetes reporting all BP readings (N=20; 12 (60.0%) had BP measured according to guidelines)</b> |                                 |                       |              |              |
| <b>Systolic</b>                                                                                                           | <b>1 (n=12)</b>                 | 135.8 (31.5)          | -            | -            |
|                                                                                                                           | <b>2 (n=4)</b>                  | 160.8 (22.5)          | 158.5 (19.4) | -            |
|                                                                                                                           | <b>3 (n=4)</b>                  | 154.5 (8.3)           | 152.3 (6.7)  | 144.3 (11.5) |
| <b>Diastolic</b>                                                                                                          | <b>1 (n=12)</b>                 | 75.3 (12.5)           | -            | -            |
|                                                                                                                           | <b>2 (n=4)</b>                  | 89.8 (8.9)            | 87.8 (10.8)  | -            |
|                                                                                                                           | <b>3 (n=4)</b>                  | 89.0 (16.3)           | 87.0 (14.1)  | 84.0 (13.9)  |

**Table S11: Likelihood of having BP measured multiple times or being asked to monitor BP at home, according to patient and practitioner characteristics in patients with and without diabetes, excluding possible duplicate submissions**

|                                                                           | Likelihood of multiple BP measurements<br>(n (%) in each group)<br>(difference [95% confidence interval]) | Likelihood of being asked to monitor BP at home<br>(n (%) in each group)<br>(difference [95% confidence interval]) |
|---------------------------------------------------------------------------|-----------------------------------------------------------------------------------------------------------|--------------------------------------------------------------------------------------------------------------------|
| <b>In patients with diabetes</b>                                          |                                                                                                           |                                                                                                                    |
| <b>If the patient is hypertensive vs. normotensive</b>                    | 45/98 (45.9%) vs. 27/74 (36.5%)<br>difference = 9.4% [-5.3 to 24.2%]                                      | 24/153 (15.7%) vs. 11/110 (10.0%)<br>difference = 5.7% [-2.4 to 13.7%]                                             |
| <b>If the patient has treated hypertension vs. untreated hypertension</b> | 39/88 (44.3%) vs. 6/10 (60.0%)<br>difference = 15.7% [-16.4 to 47.8%]                                     | 22/135 (16.3%) vs. 2/18 (11.1%)<br>difference = 5.2% [-10.6 to 21.0%]                                              |
| <b>If BP was measured by a GP vs. a nurse</b>                             | 16/36 (44.4%) vs. 54/130 (41.5%)<br>difference = 2.9% [-15.4 to 21.2%]                                    | 11/36 (30.6%) vs. 15/130 (11.5%)<br>difference = 19.0% [3.0 to 35.0%]                                              |
| <b>In patients without diabetes</b>                                       |                                                                                                           |                                                                                                                    |
| <b>If the patient is hypertensive vs. normotensive</b>                    | 9/27 (33.3%) vs. 2/6 (33.3%)<br>difference = 0.0% [-41.7 to 41.7%]                                        | 14/40 (35.0%) vs. 0/14 (0.0%)<br>difference = 35.0% [20.2 to 49.8%]                                                |
| <b>If the patient has treated hypertension vs. untreated hypertension</b> | 8/22 (36.4%) vs. 1/5 (20.0%)<br>difference = 16.4% [-24.1 to 56.8%]                                       | 9/31 (29.0%) vs. 5/9 (55.6%)<br>difference = 26.5% [-9.7 to 62.7%]                                                 |
| <b>If BP was measured by a GP vs. a nurse</b>                             | 9/21 (42.9%) vs. 2/10 (20.0%)<br>difference = 22.9% [-9.7 to 55.5%]                                       | 7/21 (33.3%) vs. 4/10 (40.0%)<br>difference = 6.7% [-29.8 to 43.1%]                                                |

**STROBE 2007 (v4) Statement—Checklist of items that should be included in reports of *cross-sectional studies***

| Section/Topic                | Item # | Recommendation                                                                                                                                                                       | Reported on page # |
|------------------------------|--------|--------------------------------------------------------------------------------------------------------------------------------------------------------------------------------------|--------------------|
| <b>Title and abstract</b>    | 1      | (a) Indicate the study's design with a commonly used term in the title or the abstract                                                                                               | 1                  |
|                              |        | (b) Provide in the abstract an informative and balanced summary of what was done and what was found                                                                                  | 2                  |
| <b>Introduction</b>          |        |                                                                                                                                                                                      |                    |
| Background/rationale         | 2      | Explain the scientific background and rationale for the investigation being reported                                                                                                 | 3                  |
| Objectives                   | 3      | State specific objectives, including any prespecified hypotheses                                                                                                                     | 3                  |
| <b>Methods</b>               |        |                                                                                                                                                                                      |                    |
| Study design                 | 4      | Present key elements of study design early in the paper                                                                                                                              | 4                  |
| Setting                      | 5      | Describe the setting, locations, and relevant dates, including periods of recruitment, exposure, follow-up, and data collection                                                      | 4                  |
| Participants                 | 6      | (a) Give the eligibility criteria, and the sources and methods of selection of participants                                                                                          | 4                  |
| Variables                    | 7      | Clearly define all outcomes, exposures, predictors, potential confounders, and effect modifiers. Give diagnostic criteria, if applicable                                             | 4                  |
| Data sources/<br>measurement | 8*     | For each variable of interest, give sources of data and details of methods of assessment (measurement). Describe comparability of assessment methods if there is more than one group | 4/ Supplement      |
| Bias                         | 9      | Describe any efforts to address potential sources of bias                                                                                                                            | 4                  |
| Study size                   | 10     | Explain how the study size was arrived at                                                                                                                                            | 4                  |
| Quantitative variables       | 11     | Explain how quantitative variables were handled in the analyses. If applicable, describe which groupings were chosen and why                                                         | 4                  |
| Statistical methods          | 12     | (a) Describe all statistical methods, including those used to control for confounding                                                                                                | 4                  |
|                              |        | (b) Describe any methods used to examine subgroups and interactions                                                                                                                  | 4                  |
|                              |        | (c) Explain how missing data were addressed                                                                                                                                          | 5                  |
|                              |        | (d) If applicable, describe analytical methods taking account of sampling strategy                                                                                                   | N/A                |
|                              |        | (e) Describe any sensitivity analyses                                                                                                                                                | 4                  |
| <b>Results</b>               |        |                                                                                                                                                                                      |                    |

|                          |     |                                                                                                                                                                                                              |                             |
|--------------------------|-----|--------------------------------------------------------------------------------------------------------------------------------------------------------------------------------------------------------------|-----------------------------|
| Participants             | 13* | (a) Report numbers of individuals at each stage of study—eg numbers potentially eligible, examined for eligibility, confirmed eligible, included in the study, completing follow-up, and analysed            | 5/ Figure 1                 |
|                          |     | (b) Give reasons for non-participation at each stage                                                                                                                                                         | Figure 1                    |
|                          |     | (c) Consider use of a flow diagram                                                                                                                                                                           | Figure 1                    |
| Descriptive data         | 14* | (a) Give characteristics of study participants (eg demographic, clinical, social) and information on exposures and potential confounders                                                                     | Table 1/ Table S1           |
|                          |     | (b) Indicate number of participants with missing data for each variable of interest                                                                                                                          | 5/Table 1/ S1               |
| Outcome data             | 15* | Report numbers of outcome events or summary measures                                                                                                                                                         | 5                           |
| Main results             | 16  | (a) Give unadjusted estimates and, if applicable, confounder-adjusted estimates and their precision (eg, 95% confidence interval). Make clear which confounders were adjusted for and why they were included | 5/ Table 2/ Figures 2 and 3 |
|                          |     | (b) Report category boundaries when continuous variables were categorized                                                                                                                                    | N/A                         |
|                          |     | (c) If relevant, consider translating estimates of relative risk into absolute risk for a meaningful time period                                                                                             | N/A                         |
| Other analyses           | 17  | Report other analyses done—eg analyses of subgroups and interactions, and sensitivity analyses                                                                                                               | 5/Supplement                |
| <b>Discussion</b>        |     |                                                                                                                                                                                                              |                             |
| Key results              | 18  | Summarise key results with reference to study objectives                                                                                                                                                     | 6                           |
| Limitations              | 19  | Discuss limitations of the study, taking into account sources of potential bias or imprecision. Discuss both direction and magnitude of any potential bias                                                   | 6                           |
| Interpretation           | 20  | Give a cautious overall interpretation of results considering objectives, limitations, multiplicity of analyses, results from similar studies, and other relevant evidence                                   | 7/8                         |
| Generalisability         | 21  | Discuss the generalisability (external validity) of the study results                                                                                                                                        | 7                           |
| <b>Other information</b> |     |                                                                                                                                                                                                              |                             |
| Funding                  | 22  | Give the source of funding and the role of the funders for the present study and, if applicable, for the original study on which the present article is based                                                | 8                           |

\*Give information separately for cases and controls in case-control studies and, if applicable, for exposed and unexposed groups in cohort and cross-sectional studies.

**Note:** An Explanation and Elaboration article discusses each checklist item and gives methodological background and published examples of transparent reporting. The STROBE checklist is best used in conjunction with this article (freely available on the Web sites of PLoS Medicine at <http://www.plosmedicine.org/>, Annals of Internal Medicine at <http://www.annals.org/>, and Epidemiology at <http://www.epidem.com/>). Information on the STROBE Initiative is available at [www.strobe-statement.org](http://www.strobe-statement.org).

# BMJ Open

## Current practice of usual clinic blood pressure measurement in people with and without diabetes: a survey and prospective "mystery shopper" study in UK primary care

|                                 |                                                                                                                                                                                                                                                                 |
|---------------------------------|-----------------------------------------------------------------------------------------------------------------------------------------------------------------------------------------------------------------------------------------------------------------|
| Journal:                        | <i>BMJ Open</i>                                                                                                                                                                                                                                                 |
| Manuscript ID                   | bmjopen-2017-020589.R1                                                                                                                                                                                                                                          |
| Article Type:                   | Research                                                                                                                                                                                                                                                        |
| Date Submitted by the Author:   | 30-Jan-2018                                                                                                                                                                                                                                                     |
| Complete List of Authors:       | Stevens, Sarah; University of Oxford, Nuffield Department of Primary Care Health Sciences<br>McManus, Richard; University of Oxford, Dept of Primary Care Health Sciences<br>Stevens, Richard; University of Oxford, Nuffield Dept Primary Care Health Sciences |
| <b>Primary Subject Heading</b>: | Cardiovascular medicine                                                                                                                                                                                                                                         |
| Secondary Subject Heading:      | Evidence based practice, General practice / Family practice, Health services research, Epidemiology, Diabetes and endocrinology                                                                                                                                 |
| Keywords:                       | PRIMARY CARE, Hypertension < CARDIOLOGY, General diabetes < DIABETES & ENDOCRINOLOGY, Protocols & guidelines < HEALTH SERVICES ADMINISTRATION & MANAGEMENT, Quality in health care < HEALTH SERVICES ADMINISTRATION & MANAGEMENT                                |
|                                 |                                                                                                                                                                                                                                                                 |

SCHOLARONE™  
Manuscripts

1  
2  
3  
4  
5 **Title: Current practice of usual clinic blood pressure measurement in**  
6 **people with and without diabetes: a survey and prospective “mystery**  
7 **shopper” study in UK primary care**  
8  
9

10  
11 **S L Stevens<sup>1</sup>, R J McManus<sup>1</sup>, R J Stevens<sup>1</sup>**  
12

- 13  
14 1. Nuffield Department of Primary Care Health Sciences, University of Oxford, Radcliffe  
15 Observatory Quarter, Woodstock Road, Oxford, OX2 6GG  
16

17 Corresponding author: Sarah Stevens, [sarah.stevens@phc.ox.ac.uk](mailto:sarah.stevens@phc.ox.ac.uk)  
18  
19

20  
21 Manuscript word count: 3334  
22  
23  
24  
25  
26  
27  
28  
29  
30  
31  
32  
33  
34  
35  
36  
37  
38  
39  
40  
41  
42  
43  
44  
45  
46  
47  
48  
49  
50  
51  
52  
53  
54  
55  
56  
57  
58  
59  
60

## Abstract

Objectives: Hypertension trials and epidemiological studies use multiple clinic blood pressure (BP) measurements at each visit. Repeat measurement is also recommended in international guidance, however little is known about how BP is measured routinely. This is important for individual patient management and because routinely recorded readings form part of research databases. We aimed to determine the current practice of BP measurement during routine general practice appointments.

Design: (1) An online cross-sectional survey and (2) A prospective “mystery shopper” study where patients agreed to report how BP was measured during their next appointment.

Setting: Primary care

Participants: Patient charity/ involvement group members completing an online survey between July 2015 and January 2016. 334 participants completed the prospective study (51.5% male, mean age = 59.3 years) of which 279 (83.5%) had diabetes.

Primary outcome: Proportion of patients having BP measured according to guidelines.

Results: 217 participants with (183) and without diabetes (34) had their BP measured at their last appointment. BP was measured in line with UK guidance in 63.7% and 60.0% of participants with and without diabetes respectively. Initial pressures were significantly higher in those who had their BP measured more than once compared to only once ( $p=0.016/0.089$  systolic and  $p<0.001/=0.022$  diastolic, in patients with/without diabetes respectively).

Conclusions: Current practice of routine BP measurement in UK primary care is often concordant with guidelines for repeat measurement. Further studies are required to confirm findings in broader populations, to confirm when a third repeat reading is obtained routinely and to assess adherence to other aspects of BP measurement guidance.

### Strengths and limitations of this study

- This survey has a novel “mystery-shopper” design, minimising biases that may be introduced by self-reported practitioner behaviour.
- We have examined how adherence to guidelines varies according to patient characteristics, whereas previous studies have taken a healthcare professional view.
- The use of an online survey may have resulted in an under-representation of some groups, such as the very elderly.
- Larger studies are required to confirm our findings with respect to second and third blood pressure readings.



## Introduction

Measurement of blood pressure (BP) is carried out in general practice by healthcare professionals on a daily basis. Such measurement is important for the diagnosis and management of hypertension, a major risk factor for cardiovascular disease (CVD) in both the general population,(1) and even more so in those with diabetes.(2) Hypertension trials and major epidemiological studies typically measure clinic BP using strict protocols on two to three times per visit in most cases.(3) For example the SPRINT(4) and ACCORD(5) trials used the mean of three readings taken automatically to guide treatment. Repeated measurement protocols are also recommended in the UK,(6) European,(7) and North American(8) hypertension guidelines. For example, current UK guidance states that BP should be re-measured if it is initially high, or if two measurements differ substantially, with out-of-office monitoring recommended in those with sustained high BP in clinic.(6) This reflects concerns that in many patients, clinic BP readings, particularly initial readings, may be systematically higher than BP during usual daily activities.(9)

Many factors can affect the accuracy of BP measurement and the number of measurements used can influence estimates of BP control.(10,11) Measurement practices may also vary depending on the focus of the consultation or patient characteristics and recorded blood pressures may also be influenced by incentive schemes such as the UK Quality and Outcomes Framework.(12,13) Potential differences between primary study protocols and clinical practice have implications for the generalisability and implementation of research findings. For example, SPRINT found that treatment to a systolic BP target of 120 mmHg resulted in fewer cardiovascular events compared to a target of 140 mmHg in low risk patients.(4) However others have argued that mean automatically measured BP of 120 mmHg may correspond to a routine measurement of 135-140 mmHg(14) and ACCORD (conducted in patients with diabetes) failed to show an effect of intensive treatment.(5)

Furthermore, increasing numbers of observational studies in electronic healthcare databases rely on routinely collected BP measurements. In particular, the recommended cardiovascular risk calculator in the UK, QRISK2,(15) was derived using such data. It is important to understand how blood pressures recorded in these databases were obtained, in order to reliably compare observational database and primary study results.

However, little is known about how BP is measured in routine practice. A 2006 survey of UK general practitioners' (GPs') adherence to hypertension guideline recommendations relied on self-reported data and did not ask about the use of repeat measurements.(16) Other European studies have focussed on whether implementation of lifestyle or treatment changes adheres to guidelines,(17) or reasons for non-adherence.(18) These studies assume that an accurate BP reading is obtained initially and ignore the specifics of BP measurement. We therefore sought to determine the current practice of BP measurement during routine appointments in UK primary care, focusing on when repeat clinic and home BP measurements are obtained.

## Patients and methods

We conducted an online survey of patients, followed by a prospective survey of primary care consultations.

### Online survey

1  
2  
3 An online survey was advertised through charities and patient involvement groups (“University of  
4 the Third Age”, “Blood Pressure UK”, “Citizen Scientist”, “Patients Active in Research”, “Call for  
5 Participants” and “Research for the Future (Help BEAT Diabetes)”) between 23rd July 2015 and 24th  
6 January 2016. Respondents anonymously reported basic demographic and health information, if and  
7 how many times their BP was measured at their last appointment and (recall permitting) their last  
8 BP reading (Supplement). Respondents were also asked about recommendations to monitor their BP  
9 at home.  
10

### 11 **Prospective study**

12 Participants completing the online survey were invited to take part in a prospective study. They were  
13 told the study would ask similar questions to those already asked about their BP after their next  
14 primary care appointment. Those wishing to take part gave explicit consent, provided an email  
15 address and were asked when they expected their next appointment to be. After the anticipated  
16 time of this appointment, a link to an online questionnaire was emailed to participants. This asked  
17 whether BP was measured at the appointment; and if so, how many times, and (recall permitting)  
18 for up to three systolic and diastolic BP values (Supplement). The questionnaire was open from 23rd  
19 July 2015 to 16th June 2016. Two patient representatives helped design the study materials and  
20 three were asked to pilot the survey websites to test functionality. The study was approved by the  
21 Medical Sciences Interdivisional Research Ethics Committee, University of Oxford (reference: MS-  
22 IDREC-C1-2015-095).  
23

### 24 **Statistical Analysis**

25 The prospective study was powered to estimate the proportion of people having their BP measured  
26 once or multiple times, in line with guidelines at the 95% confidence level with an accuracy of +/-5%.  
27 Assuming a proportion of 10%, 139 respondents who had had their BP measured was required.<sup>(19)</sup>  
28

29 Demographic and clinical history data were summarised using means and standard deviations or  
30 proportions. Mean BP was summarized with 95% confidence intervals and ranges. Respondents  
31 were classified as hypertensive if they answered yes to the question “Have you got high blood  
32 pressure or have you ever been told by your GP that you have high blood pressure?”. Responses  
33 were assessed against NICE guidance and BP was deemed to have been measured according to  
34 guidelines if BP was measured; a) once and the reading was below 140/90 mmHg, b) twice if the  
35 initial reading was above 140/90 mmHg and the first two readings differed by less than 5 mmHg  
36 systolic, or c) three times if the first reading was above 140/90 mmHg and the first two readings  
37 differed by more than 5 mmHg systolic.<sup>(6)</sup> Respondents who had their BP measured more or less  
38 than guidance recommends were deemed not to have had their BP measured according to guidance.  
39 Proportions were compared using two-sided tests of proportions, under the assumption of large  
40 samples, at the 5% level. Due to an unexpectedly large proportion of participants with diabetes, a  
41 decision to stratify all prospective study analyses by patient diabetes status was made after data  
42 collection.  
43

44 Since behaviour amongst professionals from the same practice may be similar, sensitivity analyses  
45 were carried out by randomly selecting one observation from each postcode district (assuming  
46 respondents from different districts are registered to distinct practices). We also conducted  
47 sensitivity analyses excluding prospective responses that were suspected of being duplicate  
48  
49  
50  
51  
52  
53  
54  
55  
56  
57  
58  
59  
60

1  
2  
3 submissions of the same initial survey data. Analysis was conducted using Stata 14,(20) and R  
4 3.3.1.(21)  
5  
6

## 7 **Results**

8 In total 2176 unique users visited the survey site, of whom 756 completed the initial online survey,  
9 with complete data available in 743 individuals (623 with diabetes, 83.9%). Consent for the  
10 prospective study was given by 593 participants and was completed by 334 participants (279 with  
11 diabetes, 83.5%) (Fig. 1). The characteristics of those completing the initial and prospective surveys  
12 were broadly similar (Table S1, Supplement).  
13  
14

### 15 **Initial survey**

16 Of the 743 people completing the first survey, 489 (65.8%) reported having had their BP measured at  
17 their last appointment: 156 (31.9% of 489) by a GP, 321 (65.6%) by a nurse and 12 (2.5%) in the  
18 waiting room. Most respondents (480/489, 98.2%) could recall how many BP readings were taken:  
19 286 (59.6% of 480) one, 144 (30.0%) two and 50 (10.4%) three or more readings. Results stratified by  
20 diabetes status are given in the supplement (Tables S2 and S3). Only 88 patients (11.8%) recalled  
21 ever having their BP measured in both arms at any one previous appointment. Compared to  
22 normotensives (20/330, (6.7%)), respondents with a previous diagnosis of hypertension (68/413,  
23 (16.5%)) were more likely to report having had their BP measured in both arms at any appointment  
24 previously.  
25  
26  
27

### 28 **Prospective study**

29 Baseline characteristics for those with and without diabetes completing the prospective study after a  
30 further GP appointment are given in Table 1. Of the 279 participants with diabetes completing the  
31 follow-up questionnaire, 183 (65.6%) had their BP measured at the appointment: 38 (20.8%) by a  
32 GP, 139 (76.0%) by a nurse and 6 (3.3%) by themselves in the waiting room. Of the 55 participants  
33 without diabetes, 34 (61.8%), had their BP measured: 21 (61.8%) by a GP, 11 (32.4%) by a nurse and  
34 2 (5.9%) by themselves in the waiting room.  
35  
36  
37

#### 38 *Participants with diabetes*

39 Of the 183 participants with diabetes who had their BP measured, 91 (49.7%) could recall a value for  
40 all of the BP readings given. Fifty-eight respondents (63.7%, 95% CI [53.0 to 73.6%]) had their BP  
41 measured according to guidelines. Mean BP values by reading number are presented graphically in  
42 Fig. 2A (systolic) and Fig. 2B (diastolic, see Table S4 for raw data). Initial systolic and diastolic blood  
43 pressures were lower in participants who had their BP measured only once than in those who had it  
44 measured two or more times (mean systolic difference = 8.0 mm Hg, 95% CI [1.2 to 14.5 mm Hg],  
45  $p=0.016$  and mean diastolic difference = 9.9 mm Hg, 95% CI [5.1 to 14.6 mm Hg],  $p<0.001$ ).  
46  
47  
48

49 The proportion of participants with diabetes who had their BP measured multiple times was similar  
50 regardless of hypertensive or treatment status, or measurement personnel (Table 2, top left).  
51 However, they were more likely to be asked to monitor their BP at home when BP was measured by  
52 a GP compared to a nurse (Table 2, top right). Those who had their BP measured once, twice and  
53 three or more times, were asked to monitor their BP at home in 10/109 (9.2%, 95% CI [3.8 to  
54 14.6%]), 11/51 (21.6%, 95% CI [10.3% to 32.9%]) and 7/23 (30.4%, 95% CI [11.6 to 49.2%]) cases  
55 respectively.  
56  
57  
58

### *Participants without diabetes*

Of the 34 participants without diabetes who had their BP measured, 20 (58.8%) could recall a value for all of the BP readings given. Twelve respondents (60.0%, 95% CI [36.1% to 80.9%]) had their BP measured according to guidelines. Mean BP values by reading number are presented graphically in Fig. 3A (systolic) and Fig. 3B (diastolic, see Table S5 for raw data). Patterns of repeat BP measurement were similar to those observed in participants with diabetes, although numbers in this group were smaller. Initial systolic blood pressures were non-significantly lower in participants who had their BP measured only once than in those who had it measured two or more times (mean systolic difference = 21.8 mm Hg, 95% CI [-3.7 to 47.3 mm Hg],  $p=0.089$ ). However, a significant difference was observed for diastolic pressure (mean diastolic difference = 14.1 mm Hg, 95% CI [2.3 to 26.0 mm Hg],  $p=0.022$ ).

The proportion of participants without diabetes who had their BP measured multiple times was similar regardless of hypertensive or treatment status, or measurement personnel (Table 2, bottom left). However, those with hypertension were more likely to be asked to monitor their BP at home compared to normotensives (Table 2, bottom right). Those who had their BP measured once, twice and three or more times, were asked to monitor their BP at home in 5/23 (21.7%, 95% CI [4.9 to 38.6%]), 3/5 (60.0%, 95% CI [17.1% to 100.0%]) and 3/6 (50.0%, 95% CI [10.0 to 90.0%]) cases respectively.

### **Sensitivity analyses**

Results were similar after randomly sampling responses from unique postcode districts (Tables S6 to S8) or when excluding prospective responses suspected of being duplicate submissions of the initial survey data (Tables S9 to S11).

## **Discussion**

### **Summary**

This study has shown that a second BP measurement at clinic visit is more likely to be taken if the initial BP measurement is high. This is consistent with UK guidelines. However, there is no clear evidence that the decision to take a third measurement follows guidelines. The recommendation that a third measurement be taken only when the first two are discrepant (first measurement above threshold but second below threshold for diagnosis of hypertension) was not obviously reflected in our data, although confidence intervals are wide. Although the majority of this evidence relates to people with diabetes, similar BP measurement practices were observed in those without diabetes.

### **Strengths and limitations**

The patient centred nature of this study has allowed us to see into the consulting room for the first time and to determine how BP is measured in “real life”, in those with and without diabetes. Previous studies have taken a healthcare professional view.<sup>(16)</sup>

Our online survey was limited by the use of convenience mechanisms for recruitment, and like many internet surveys with no known denominator, these results should be interpreted with caution. The use of an online system itself may have resulted in an under-representation of some groups, such as the very elderly.<sup>(22)</sup> For the prospective study, we were able to obtain “mystery shopper” type data

1  
2  
3 on more than two hundred GP and nurse appointments without potentially influencing the  
4 appointment through direct observation by a researcher. To our knowledge, these data are unique.  
5 The lower numbers of respondents without diabetes could limit generalisability if health care  
6 professionals follow protocols less carefully in patients without additional cardiovascular risk  
7 factors.(23) Recruitment through patient involvement groups may have also resulted in over-  
8 representation of patients who are actively engaged with their healthcare, and due to phenomenon  
9 such as the inverse-care law,(24) may receive better quality (guideline adherent) care. However,  
10 since our aim was to study the behaviours of healthcare professionals, it is unclear how any biases at  
11 the patient-level will have translated into biases at the healthcare professional level. Furthermore,  
12 previous research regarding current practice of BP self-monitoring, showed similar results using both  
13 convenience and representative sampling of professionals.(25)  
14  
15

16  
17 Although our mechanism of data collection, asking patients to study the behaviour of their health  
18 care practitioners, has the limitations discussed above, we chose our “mystery shopper” approach  
19 over several other study designs. For a full discussion of the study designs considered see Stevens  
20 PhD thesis, 2017.(26) Briefly, studies based on alternative methodologies, such as practitioner self-  
21 report or direct observation, would have been subject to selection bias among practitioners, the  
22 Hawthorne effect, and reporting bias and we have avoided these biases through our novel design.  
23  
24

25 Self-reported BP readings may have been subject to rounding error, digit preference or recall error.  
26 This introduces uncertainty into some analyses concerning blood pressure values, but the number of  
27 measurements taken, is likely to be recalled with greater accuracy, especially in the prospective  
28 study. Guidance covers many factors affecting the accuracy of BP measurement, such as the use an  
29 appropriately sized cuff, but such factors are less easily assessed by patients and we chose to limit  
30 the focus of this study in order to maximise response rates. The type and accuracy of devices used in  
31 UK general practice has been studied previously,(27) but further direct observation of clinicians is  
32 warranted to determine if other aspects of BP measurement guidance is followed.  
33  
34

35 Fewer than anticipated participants provided all BP readings and therefore we could only estimate  
36 the proportion of people with diabetes having their BP measured according to guidelines with an  
37 error of +/- 10% (compared to an original target of +/-5%). However, we have demonstrated  
38 important differences (for example in first systolic BP readings) despite this. Although we have  
39 demonstrated that BP is measured in line with guidance in the majority of cases, this was driven by a  
40 large number of participants with low BP who had their BP measured only once. Larger studies  
41 would be required to confirm our findings, particularly with respect to second and third readings and  
42 in those without diabetes.  
43  
44

45 Many factors, other than the initial BP value, can influence the decision to measure BP multiple  
46 times including previous measurement of BP in clinic or at home and the presence of cardiovascular  
47 disease or cardiovascular risk factors. Such factors may explain the considerable variability in BP  
48 measurement practices observed in some specific patient examples. Although we have addressed  
49 key factors such as diabetes, hypertension and treatment status, future research could explore  
50 behaviour in other subgroups. Furthermore, we did not ask respondents about the primary reason  
51 for their consultation which may have influenced BP measurement and this also requires further  
52 study.  
53  
54  
55

## 56 **Comparison with existing literature**

57

1  
2  
3 A previous review(18) of barriers to hypertension awareness and treatment found that professionals  
4 were concerned about the accuracy of individual clinic BP readings. Our results support the idea that  
5 professionals treat single readings with caution, particularly those above the diagnostic threshold  
6 which require further action (e.g. in the form of treatment change). Although numbers were smaller,  
7 results suggest that this caution also extends to high BP sustained over two readings. Previous  
8 research suggests that recording of blood pressure may be influenced by specific BP related targets  
9 in the UK's Quality and Outcomes Framework,(12) and hence routine practice in other healthcare  
10 systems, with different incentive schemes, may differ. Despite agreement between current practice  
11 and guidelines, GPs may be better advised to use multiple readings more widely,(28) to ensure  
12 comparability with BP monitoring studies and detection of masked hypertension which affects  
13 approximately 19% of adults.(29)  
14  
15

16  
17 The finding that patients are more likely to be monitored at home if they have high clinic pressures  
18 or hypertension is consistent with results from a recent practitioner survey in Canada, (30) where  
19 guidance is similar.(31) A recent survey of general practices in the South West of England found that  
20 only 1 in 10 GP practices were not following current guidelines for the use of home and ambulatory  
21 BP monitoring in the diagnosis of hypertension,(32) which is also consistent with our results in that  
22 guidance appears to be followed in most cases.  
23  
24

25 GPs were more likely to recommend home monitoring than nurses in those with diabetes. It is  
26 difficult to interpret this finding as it may reflect the primary reason for consultation, with certain  
27 tasks (such as diabetes reviews) performed primarily by nurses. Current guidance for BP  
28 management in diabetes recommends that high BP is confirmed at subsequent appointments, rather  
29 than through home monitoring.(33) Hence this finding, which importantly was not replicated in  
30 those without diabetes, may be explained if many of those with diabetes had annual review  
31 appointments. Overall, few patients were encouraged to monitor their BP at home, although it is  
32 likely that around 31% of patients were already self-monitoring based on previous UK survey  
33 data.(34)  
34  
35

### 36 **Implications for research and practice**

37 Our findings indicate that routine BP measurement does not reflect the strict measurement  
38 protocols in primary research studies. This has implications for patient care if results from primary  
39 research studies cannot be appropriately translated into guidance for routine care (e.g. in the form  
40 of adjusted treatment targets). Users of electronic healthcare databases should also be aware of the  
41 potential for recording biases(12) which may dilute the observed effect of BP on outcomes and may  
42 extend to other biological factors subject to measurement error.  
43  
44

45  
46 The current practice of BP measurement will, reassuringly, detect white coat hypertension but may  
47 not identify those with masked effects (where BP is higher outside of the clinic). This could  
48 potentially result in missed diagnoses and sub-optimal treatment. One solution which would not  
49 increase workload is use of the PROOF-BP tool which was developed by two of the authors with  
50 colleagues.(35) This combines factors associated with home-clinic BP differences with BP readings to  
51 identify which patients may exhibit masked or white coat effects and would benefit most from out-  
52 of-office monitoring. It accurately identifies hypertension in 93% of cases and is more accurate than  
53 current diagnostic guidelines.(36) Implementation of this tool could improve detection of masked  
54 effects and avoid unnecessary out-of-office monitoring.  
55  
56  
57

1  
2  
3 Less than 1 in 5 participants with hypertension reported having their BP measured in both arms at a  
4 single appointment previously. Large differences between arms are associated with vascular disease  
5 and mortality.(37) These results suggest little change since 13% of GPs said they adhered to this  
6 recommendation a decade ago.(16) Other recent estimates suggest that around half of practices  
7 measure BP in both arms as part of the diagnostic procedure,(32) which, although more optimistic,  
8 further demonstrates room for improvement. Barriers to such improvement may include  
9 practitioner discordance with guidance (previously only 30% agreed with the recommendation), or a  
10 lack of a suitable devices.(38)  
11  
12

13 The results of this study provide a preliminary insight into how BP is measured routinely and indicate  
14 that repeat BP measurements are taken in line with guidelines but not with strict study protocols.  
15 The impact of these differences on patient care requires further investigation.  
16  
17  
18  
19  
20

## 21 **Funding**

22 This project is funded by the National Institute for Health Research School for Primary Care Research  
23 (NIHR SPCR). The views expressed are those of the author(s) and not necessarily those of the NHS,  
24 the NIHR or the Department of Health.  
25  
26  
27

## 28 **Conflicts of interest**

29 RM has received BP monitoring equipment for research purposes from Lloyds Pharmacies and  
30 Omron.  
31

## 32 **Contributions**

33  
34 All authors conceived and designed the study. SS was responsible for the management of the study  
35 and carried out the statistical analysis. SS drafted the paper which RS and RM then contributed to.  
36  
37

## 38 **Collaborators**

39  
40 We thank computer programmers David Judge and Luis Castello (Nuffield Department of Primary  
41 Care Health Sciences, University of Oxford) who developed and managed the survey sites. We also  
42 thank patient representatives Derek Shaw, Valerie Keston-Hole and others for their help developing  
43 the study materials.  
44  
45  
46

## 47 **Data sharing**

48 No additional data are available.  
49  
50  
51  
52  
53  
54  
55  
56  
57  
58  
59  
60

## References

1. Lewington S, Clarke R, Qizilbash N, Peto R, Collins R. Age-specific relevance of usual blood pressure to vascular mortality: A meta-analysis of individual data for one million adults in 61 prospective studies. *Lancet* [Internet]. 2002;360(9349):1903–13. Available from: <http://www.scopus.com/inward/record.url?eid=2-s2.0-0037079309&partnerID=40&md5=6b6019ec4f94d9603b79803a2fbcd31e>
2. Adler AI, Stratton IM, Neil HAW, Yudkin JS, Matthews DR, Cull CA, et al. Association of systolic blood pressure with macrovascular and microvascular complications of type 2 diabetes (UKPDS 36): prospective observational study. *BMJ* [Internet]. 2000 [cited 2017 Jun 6];321(7258). Available from: <http://www.bmj.com/content/321/7258/412>
3. Giorgini P, Weder AB, Jackson EA, Brook RD. A review of blood pressure measurement protocols among hypertension trials: Implications for “evidence-based” clinical practice. *J Am Soc Hypertens*. 2014;8(9):670–6.
4. The SPRINT Research Group. A Randomized Trial of Intensive versus Standard Blood-Pressure Control. *N Engl J Med* [Internet]. 2015 Nov 26 [cited 2016 Sep 23];373(22):2103–16. Available from: <http://www.nejm.org/doi/10.1056/NEJMoa1511939>
5. The ACCORD Study Group. Effects of Intensive Blood-Pressure Control in Type 2 Diabetes Mellitus. *N Engl J Med* [Internet]. 2010 Apr 29 [cited 2017 Jun 6];362(17):1575–85. Available from: <http://www.nejm.org/doi/abs/10.1056/NEJMoa1001286>
6. National Institute for Health and Care Excellence. Hypertension: Clinical management of primary hypertension in adults (NICE CG127). National Institute for Health and Care Excellence; 2011.
7. Mancia G, Fagard R, Narkiewicz K, Redon J, Zanchetti A, Böhm M, et al. 2013 ESH/ESC guidelines for the management of arterial hypertension: the Task Force for the Management of Arterial Hypertension of the European Society of Hypertension (ESH) and of the European Society of Cardiology (ESC). *Eur Heart J* [Internet]. 2013 Jul 14 [cited 2014 Jul 10];34(28):2159–219. Available from: <http://eurheartj.oxfordjournals.org/content/early/2013/06/13/eurheartj.eht151>
8. James PA, Oparil S, Carter BL, Cushman WC, Dennison-Himmelfarb C, Handler J, et al. Evidence-Based Guideline for the Management of High Blood Pressure in Adults. *Jama* [Internet]. 2013;1097(5):1–14. Available from: <http://jama.jamanetwork.com/article.aspx?articleid=1791497%5Cnhttp://jama.jamanetwork.com/article.aspx?doi=10.1001/jama.2013.284427>
9. Pickering TG, Gerin W, Schwartz AR. What is the white-coat effect and how should it be measured? *Blood Press Monit* [Internet]. 2002;7(6):329–33. Available from: <http://ovidsp.ovid.com/ovidweb.cgi?T=JS&PAGE=reference&D=emed5&NEWS=N&AN=2003053147>
10. Birkett NJ. The effect of alternative criteria for hypertension on estimates of prevalence and control. *J Hypertens*. 1997;15:237–44.
11. McAlister FA, Straus SE. Evidence based treatment of hypertension: Measurement of blood pressure: an evidence based review. *BMJ*. 2001;322(7291):908–11.
12. Carey IM, Nightingale CM, DeWilde S, Harris T, Whincup PH, Cook DG. Blood pressure recording bias during a period when the Quality and Outcomes Framework was introduced. *J*



- Hum Hypertens [Internet]. 2009 Nov 12 [cited 2016 Aug 4];23(11):764–70. Available from: <http://www.nature.com/doi/10.1038/jhh.2009.18>
13. Doran T, Fullwood C, Gravelle H, Reeves D, Kontopantelis E, Hiroeh U, et al. Pay-for-performance programs in family practices in the United Kingdom. *N Engl J Med* [Internet]. 2006 Jul 27 [cited 2015 Jun 10];355(4):375–84. Available from: <http://www.ncbi.nlm.nih.gov/pubmed/16870916>
14. Schiffrin EL, Calhoun DA, Flack JM. Do We Need a New Definition of Hypertension After SPRINT? *Am J Hypertens* [Internet]. 2016 Oct [cited 2016 Sep 23];29(10):1127–9. Available from: <http://www.ncbi.nlm.nih.gov/pubmed/27334926>
15. Hippisley-Cox J, Coupland C, Vinogradova Y, Robson J, Minhas R, Sheikh A, et al. Predicting cardiovascular risk in England and Wales: prospective derivation and validation of QRISK2. *BMJ* [Internet]. 2008;336(7659):1475–82. Available from: <http://www.pubmedcentral.nih.gov/articlerender.fcgi?artid=2440904&tool=pmcentrez&rendertype=abstract>
16. Heneghan C, Perera R, Mant D, Glasziou P. Hypertension guideline recommendations in general practice: awareness, agreement, adoption, and adherence. *Br J Gen Pract* [Internet]. 2007 Dec [cited 2015 Feb 4];57(545):948–52. Available from: <http://www.pubmedcentral.nih.gov/articlerender.fcgi?artid=2084133&tool=pmcentrez&rendertype=abstract>
17. Meneton P, Ricordeau P, Weill A, Tuppin P, Samson S, Allemand H, et al. Evaluation of the agreement between guidelines and initial antihypertensive drug treatment using a national health care reimbursement database. *J Eval Clin Pract* [Internet]. 2012 Jun [cited 2016 May 5];18(3):623–9. Available from: <http://www.ncbi.nlm.nih.gov/pubmed/21276142>
18. Khatib R, Schwalm J-D, Yusuf S, Haynes RB, McKee M, Khan M, et al. Patient and healthcare provider barriers to hypertension awareness, treatment and follow up: a systematic review and meta-analysis of qualitative and quantitative studies. *PLoS One* [Internet]. 2014 Jan 15 [cited 2016 Apr 16];9(1):e84238. Available from: <http://journals.plos.org/plosone/article?id=10.1371/journal.pone.0084238>
19. Bartlett JE, Kotrlik JW, Higgins CC. Organizational Research: Determining Appropriate Sample Size in Survey Research. *Inf Technol Learn Perform J*. 2001;19(1).
20. StataCorp. *Stata Statistical Software: Release 14*. College Station, Texas, USA: StataCorp LP; 2015.
21. R Core Team. *R: A language and environment for statistical computing*. [Internet]. R Foundation for Statistical Computing, Vienna, Austria; 2016. Available from: <https://www.r-project.org/>
22. Office for National Statistics. *Internet users in the UK : 2016* [Internet]. 2016. Available from: <https://www.ons.gov.uk/businessindustryandtrade/itandinternetindustry/bulletins/internetusers/2016>
23. Stamler J, Vaccaro O, Neaton JD, Wentworth D. Diabetes, Other Risk Factors, and 12-Yr Cardiovascular Mortality for Men Screened in clusively of people with the Multiple Risk Factor Intervention Trial. *Diabetes Care*. 1993;16(2):434–44.
24. Mercer SW, Guthrie B, Furler J, Watt GCM, Hart JT. Multimorbidity and the inverse care law in primary care. *BMJ* [Internet]. 2012 [cited 2017 Apr 21];344:e4152. Available from:

- 1  
2  
3 <http://eprints.gla.ac.uk>
- 4  
5 25. Fletcher BR, Hinton L, Bray EP, Hayen A, Hobbs FR, Mant J, et al. Self-monitoring blood  
6 pressure in patients with hypertension: an internet-based survey of UK GPs. *Br J Gen Pract*  
7 [Internet]. 2016;66(652):e831–7. Available from:  
8 <http://bjgp.org/cgi/doi/10.3399/bjgp16X687037>
- 9  
10 26. Stevens SL. Improving cardiovascular risk prediction through more accurate and alternative  
11 methods of blood pressure measurement. University of Oxford; 2017.
- 12  
13 27. A'Court C, Stevens R, Sanders S, Ward A, McManus R, Heneghan C. Type and accuracy of  
14 sphygmomanometers in primary care: a cross-sectional observational study. *Br J Gen Pract*  
15 [Internet]. 2011 Sep [cited 2016 Jun 22];61(590):e598-603. Available from:  
16 <http://www.ncbi.nlm.nih.gov/pubmed/22152749>
- 17  
18 28. Keenan K, Hayen A, Neal BC, Irwig L. Long term monitoring in patients receiving treatment to  
19 lower blood pressure: analysis of data from placebo controlled randomised controlled trial.  
20 *BMJ*. 2009;338.
- 21  
22 29. Verberk WJ, Kessels AGH, de Leeuw PW. Prevalence, Causes, and Consequences of Masked  
23 Hypertension: A Meta-analysis. *Am J Hypertens* [Internet]. 2008 Sep 1 [cited 2017 Dec  
24 20];21(9):969–75. Available from: [https://academic.oup.com/ajh/article-](https://academic.oup.com/ajh/article-lookup/doi/10.1038/ajh.2008.221)  
25 [lookup/doi/10.1038/ajh.2008.221](https://academic.oup.com/ajh/article-lookup/doi/10.1038/ajh.2008.221)
- 26  
27 30. Kaczorowski J, Myers MG, Gelfer M, Dawes M, Mang EJ, Berg A, et al. How do family  
28 physicians measure blood pressure in routine clinical practice? *Can Fam Physician* [Internet].  
29 2017 [cited 2017 Apr 24];63(3). Available from: <http://www.cfp.ca/content/63/3/e193>
- 30  
31 31. Leung AA, Nerenberg K, Daskalopoulou SS, McBrien K, Zarnke KB, Dasgupta K, et al.  
32 Hypertension Canada's 2016 Canadian Hypertension Education Program Guidelines for Blood  
33 Pressure Measurement, Diagnosis, Assessment of Risk, Prevention, and Treatment of  
34 Hypertension. *Can J Cardiol*. 2016;32(5):569–88.
- 35  
36 32. Mejzner N, Clark CE, Smith LF, Campbell JL. Trends in the diagnosis and management of  
37 hypertension: repeated primary care survey in South West England. *Br J Gen Pract* [Internet].  
38 2017 [cited 2017 May 4];67(658). Available from: <http://bjgp.org/content/67/658/e306>
- 39  
40 33. National Institute for Health and Care Excellence. NICE CG28. Type 2 diabetes in adults:  
41 management [Internet]. NICE; 2015 [cited 2017 Dec 21]. Available from:  
42 [https://www.nice.org.uk/guidance/ng28/chapter/1-Recommendations#blood-pressure-](https://www.nice.org.uk/guidance/ng28/chapter/1-Recommendations#blood-pressure-management-2)  
43 [management-2](https://www.nice.org.uk/guidance/ng28/chapter/1-Recommendations#blood-pressure-management-2)
- 44  
45 34. Baral-Grant S, Haque MS, Nouwen A, Greenfield SM, McManus RJ. Self-Monitoring of Blood  
46 Pressure in Hypertension: A UK Primary Care Survey. *Int J Hypertens* [Internet]. 2012 [cited  
47 2017 May 12];2012:582068. Available from:  
48 <http://www.ncbi.nlm.nih.gov/pubmed/22013510>
- 49  
50 35. Sheppard JP, Fletcher B, Gill P, Martin U, Roberts N, McManus RJ. Predictors of the Home-  
51 Clinic Blood Pressure Difference: A Systematic Review and Meta-Analysis. *Am J Hypertens*  
52 [Internet]. 2016 May [cited 2016 Aug 11];29(5):614–25. Available from:  
53 <http://ajh.oxfordjournals.org/lookup/doi/10.1093/ajh/hpv157>
- 54  
55 36. Sheppard JP, Stevens R, Gill P, Martin U, Godwin M, Hanley J, et al. Predicting Out-of-Office  
56 Blood Pressure in the Clinic (PROOF-BP). *Hypertension* [Internet]. 2016 May [cited 2016 Aug  
57 11];67(5):941–50. Available from:

- 1  
2  
3 <http://hyper.ahajournals.org/lookup/doi/10.1161/HYPERTENSIONAHA.115.07108>  
4  
5 37. Clark CE, Taylor RS, Shore AC, Ukoumunne OC, Campbell JL. Association of a difference in  
6 systolic blood pressure between arms with vascular disease and mortality: a systematic  
7 review and meta-analysis. *Lancet* [Internet]. 2012 Mar 10 [cited 2016 May 5];379(9819):905–  
8 14. Available from: <http://www.sciencedirect.com/science/article/pii/S0140673611617108>  
9  
10 38. A'Court C, Sheppard J, Greenhalgh T. Blood pressure measurement: a call to arms. *Br J Gen*  
11 *Pract.* 2016;66(652).  
12  
13  
14  
15  
16  
17  
18  
19  
20  
21  
22  
23  
24  
25  
26  
27  
28  
29  
30  
31  
32  
33  
34  
35  
36  
37  
38  
39  
40  
41  
42  
43  
44  
45  
46  
47  
48  
49  
50  
51  
52  
53  
54  
55  
56  
57  
58  
59  
60

For peer review only

**Table 1: Characteristics of participants completing the prospective survey with and without diabetes**

|                                 |                                    | <b>Participants with diabetes<br/>(N=279)</b> | <b>Participants without diabetes<br/>(N=55)</b> |
|---------------------------------|------------------------------------|-----------------------------------------------|-------------------------------------------------|
| <b>Characteristic</b>           |                                    | Mean (SD) / N (%)                             | Mean (SD) / N (%)                               |
| <b>Male</b>                     |                                    | 157 (56.3)                                    | 15 (27.3)                                       |
| <b>Age</b>                      |                                    | 59.0 (12.1)                                   | 60.3 (12.7)                                     |
| <b>Current smoker</b>           |                                    | 21 (7.5)                                      | 4 (7.3)                                         |
| <b>Hypertensive</b>             |                                    | 159 (57.0)                                    | 41 (74.6)                                       |
|                                 | <b>Antihypertensive medication</b> | 141 (88.7)                                    | 32 (78.0)                                       |
| <b>Previous CVD</b>             |                                    | 29 (10.4)                                     | 2 (3.6)                                         |
| <b>Chronic kidney disease</b>   |                                    | 11 (3.9)                                      | 1 (1.8)                                         |
| <b>Rheumatoid arthritis</b>     |                                    | 12 (4.3)                                      | 1 (1.8)                                         |
| <b>Told at high risk of CVD</b> |                                    | 26 (9.3)                                      | 4 (7.3)                                         |
| <b>Region</b>                   |                                    |                                               |                                                 |
|                                 | <b>North East</b>                  | 9 (3.2)                                       | 0 (0.0)                                         |
|                                 | <b>North West</b>                  | 111 (39.8)                                    | 14 (25.5)                                       |
|                                 | <b>Yorkshire &amp; The Humber</b>  | 19 (6.8)                                      | 1 (1.8)                                         |
|                                 | <b>East Midlands</b>               | 6 (2.2)                                       | 2 (3.6)                                         |
|                                 | <b>West Midlands</b>               | 13 (4.7)                                      | 3 (5.5)                                         |
|                                 | <b>East of England</b>             | 22 (7.9)                                      | 6 (10.9)                                        |
|                                 | <b>South West</b>                  | 40 (14.3)                                     | 9 (16.4)                                        |
|                                 | <b>South East</b>                  | 42 (15.1)                                     | 15 (27.3)                                       |
|                                 | <b>London</b>                      | 13 (4.7)                                      | 2 (3.6)                                         |
|                                 | <b>Other</b>                       | 0 (0.0)                                       | 2 (3.6)                                         |
|                                 | <b>Unknown</b>                     | 4 (1.4)                                       | 1 (1.8)                                         |

**Table 2: Likelihood of having BP measured multiple times or being asked to monitor BP at home, according to patient and practitioner characteristics (stratified by diabetes status)**

|                                                                        | Likelihood of multiple BP measurements<br>(n (%) in each group)<br>(difference [95% confidence interval]) | Likelihood of being asked to monitor BP at home<br>(n (%) in each group)<br>(difference [95% confidence interval]) |
|------------------------------------------------------------------------|-----------------------------------------------------------------------------------------------------------|--------------------------------------------------------------------------------------------------------------------|
| In participants with diabetes                                          |                                                                                                           |                                                                                                                    |
| If the participant was hypertensive vs. normotensive                   | 46/103 (44.7%) vs. 28/80 (35.0%)<br>difference = 9.7% [-4.5 to 23.9%]                                     | 24/159 (15.1%) vs. 13/120 (10.8%)<br>difference=4.3% [-3.6 to 12.1%]                                               |
| If the participant had treated hypertension vs. untreated hypertension | 40/93 (43.0%) vs. 6/10 (60.0%)<br>difference = -17.0% [-49.0 to 15.0%]                                    | 22/141 (15.6%) vs. 2/18 (11.1%)<br>difference = 4.5% [-11.2 to 20.2%]                                              |
| If BP was measured by a GP vs. a nurse                                 | 16/38 (42.1%) vs. 56/139 (40.3%)<br>difference = 1.8% [-15.9 to 19.5%]                                    | 11/38 (28.9%) vs. 15/139 (10.8%)<br>difference = 18.2% [2.8 to 33.5%]                                              |
| In participants without diabetes                                       |                                                                                                           |                                                                                                                    |
| If the participant was hypertensive vs. normotensive                   | 2/6 (33.3%) vs. 9/28 (32.1%)<br>difference = 1.2% [-40.3 to 42.7%]                                        | 14/41 (34.1%) vs. 0/14 (0.0%)<br>difference = 34.1% [19.6 to 48.7%]                                                |
| If the participant had treated hypertension vs. untreated hypertension | 8/23 (34.8%) vs. 1/5 (20.0%)<br>difference = 14.8% [-25.3 to 54.9%]                                       | 9/32 (28.1%) vs. 5/9 (55.6%)<br>difference = -27.4% [-63.4 to 8.6%]                                                |
| If BP was measured by a GP vs. a nurse                                 | 9/21 (42.9%) vs. 2/11 (18.2%)<br>difference = 24.7% [-6.4 to 55.8%]                                       | 7/21 (33.3%) vs. 4/11 (36.4%)<br>difference = -3.0% [-37.9 to 31.8%]                                               |

1  
2  
3 **Fig. 1: Study flowchart**

4  
5 **Fig.2: Mean blood pressure and 95% confidence intervals by reading number in 91 participants**  
6 **with diabetes who reported a value for each blood pressure reading in the prospective survey**  
7

8 **Fig. 3: Mean blood pressure and 95% confidence intervals by reading number in 20 participants**  
9 **without diabetes who reported a value for each blood pressure reading in the prospective survey**  
10  
11  
12  
13  
14  
15  
16  
17  
18  
19  
20  
21  
22  
23  
24  
25  
26  
27  
28  
29  
30  
31  
32  
33  
34  
35  
36  
37  
38  
39  
40  
41  
42  
43  
44  
45  
46  
47  
48  
49  
50  
51  
52  
53  
54  
55  
56  
57  
58  
59  
60

For peer review only

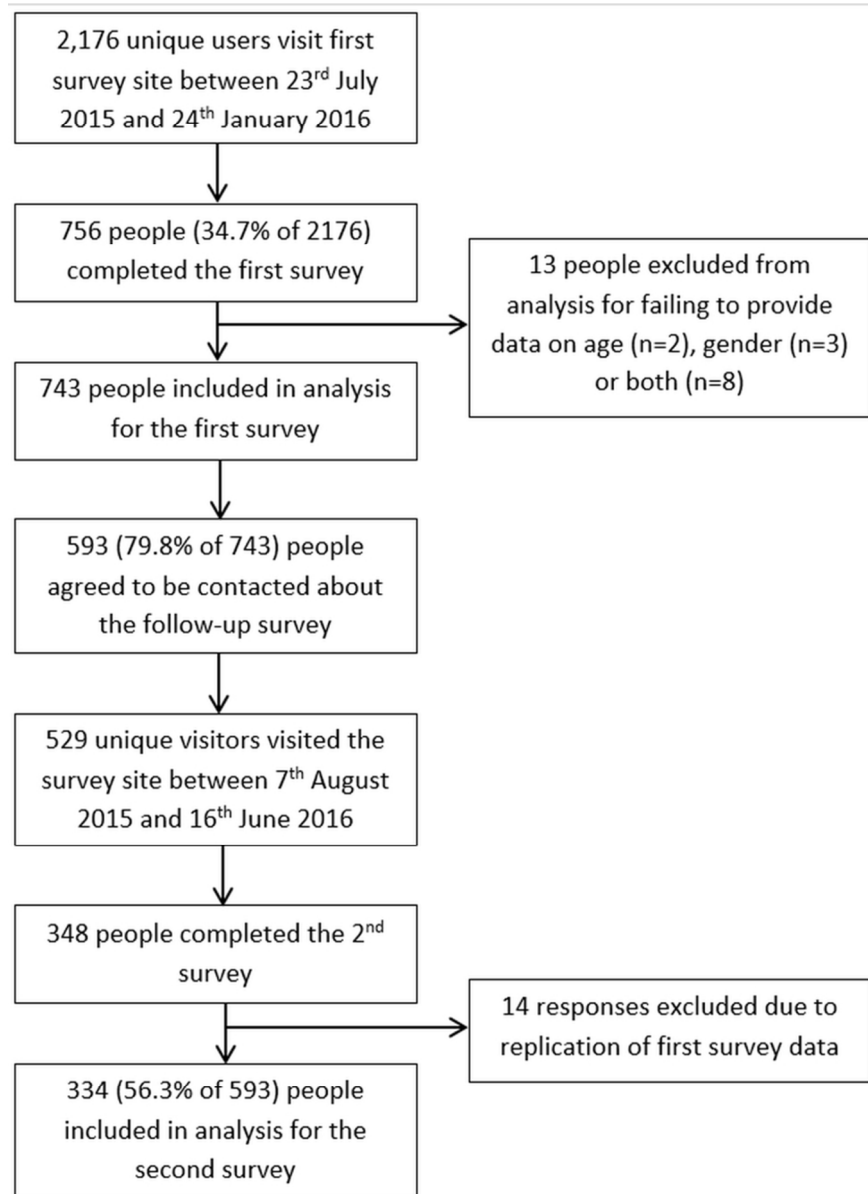

Fig. 1: Study flowchart

41x57mm (600 x 600 DPI)

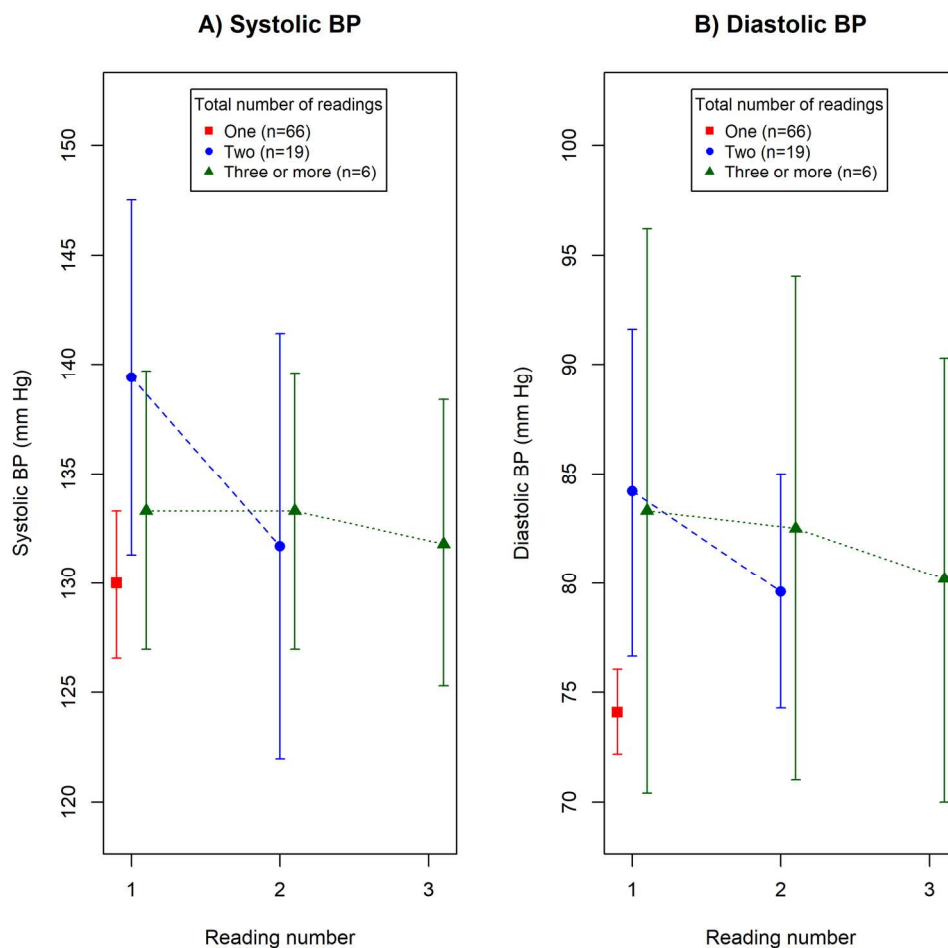

Fig.2: Mean blood pressure and 95% confidence intervals by reading number in 91 participants with diabetes who reported a value for each blood pressure reading in the prospective survey

179x179mm (300 x 300 DPI)



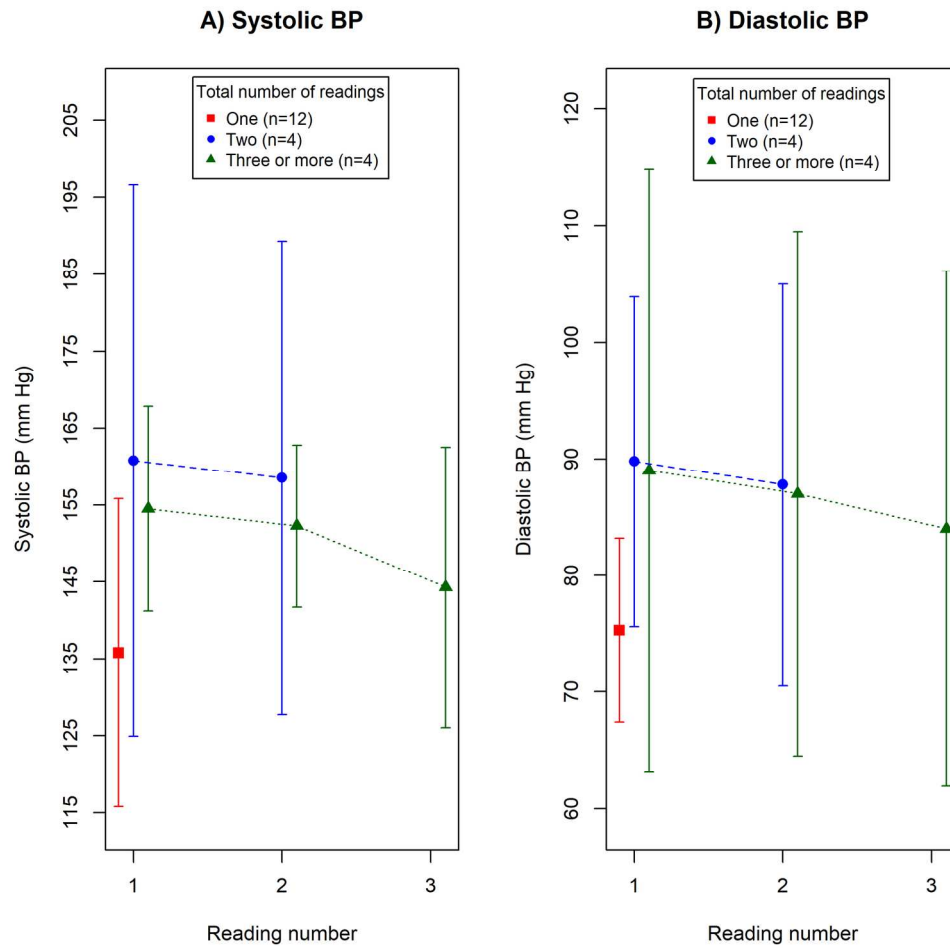

Fig. 3: Mean blood pressure and 95% confidence intervals by reading number in 20 participants without diabetes who reported a value for each blood pressure reading in the prospective survey

179x179mm (300 x 300 DPI)

## Supplementary material

### Initial survey

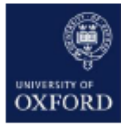

NUFFIELD DEPARTMENT OF  
**PRIMARY CARE**  
HEALTH SCIENCES

Nuffield Department of Primary Care Health Sciences • University of Oxford •  
New Radcliffe House • Radcliffe Observatory Quarter • Woodstock Road •  
Oxford OX2 6GG • [www.phc.ox.ac.uk](http://www.phc.ox.ac.uk)

Sarah Stevens  
+44 (0)1865 289449 • [sarah.stevens@phc.ox.ac.uk](mailto:sarah.stevens@phc.ox.ac.uk)

#### Survey of blood pressure measurement in primary care (Survey 1)

- Q1 Have you got high blood pressure or have you ever been told by your GP that you have high blood pressure?
- Yes. Go to Q2
  - No. Go to Q3
- Q2 Do you take any medication for your high blood pressure?
- Yes
  - No
- Q3 When was your last appointment with a GP or practice nurse at your general practice surgery?
- In the last week
  - In the last month
  - In the last 6 months
  - In the last year
  - More than a year ago
  - Can't remember
- Q4 Who was your last appointment at the surgery with?
- GP
  - Nurse
  - Can't remember
- Q5 Was your blood pressure measured during your last appointment?
- Yes, by a GP. Go to Q6
  - Yes, by a nurse. Go to Q6
  - Yes, by yourself in the waiting room. Go to Q6.
  - No. Go to Q9
  - Can't remember
- Q6 How many times was your blood pressure measured during the appointment? Count one measurement for each time the cuff on your arm went up.
- Once
  - Twice
  - Three times
  - Four or more times
  - Can't remember
- Q7 Did your GP/ nurse tell you your blood pressure reading or discuss it with you?
- Yes
  - No
  - Can't remember
- Q8 Do you know your blood pressure reading from the appointment?
- Yes. Go to Q9
  - No. Go to Q10
  - Wasn't told. Go to Q10
  - Can't remember. Go to Q10

- 1  
2  
3  
4  
5  
6  
7  
8  
9  
10  
11  
12  
13  
14  
15  
16  
17  
18  
19  
20  
21  
22  
23  
24  
25  
26  
27  
28  
29  
30  
31  
32  
33  
34  
35  
36  
37  
38  
39  
40  
41  
42  
43  
44  
45  
46  
47  
48  
49  
50  
51  
52  
53  
54  
55  
56  
57  
58  
59  
60
- Q9 What was your blood pressure reading during the appointment?  
(Your blood pressure consists of two numbers: systolic pressure and diastolic pressure. Systolic pressure is always the larger of the two numbers. For example if your blood pressure was 130/80 mmHg, 130 is the systolic reading and 80 is the diastolic reading.)
- | Systolic | Diastolic |
|----------|-----------|
| _____    | _____     |
- Q10 During your last appointment, were you asked to measure your blood pressure yourself away from the practice e.g. at home?
- Yes  
 No  
 Can't remember
- Q11 Have you ever had your blood pressure measured on both arms at the same appointment?
- Yes  
 No  
 Can't remember
- Q12 Are you
- Male  
 Female
- Q13 How old are you? \_\_\_\_\_ years
- Q14 Do you currently smoke?
- Yes  
 No
- Q15 Do you take any medication for high cholesterol e.g. statins?
- Yes  
 No
- Q16 Have you ever been told by your GP that you have had any of the following conditions or a chronic condition?  
(Tick all that apply)
- Diabetes (Type 1 or Type 2)  
 Chronic kidney disease  
 Stroke  
 Heart attack  
 Irregular heart beat (atrial fibrillation)  
 Rheumatoid arthritis  
 At high risk of having a heart attack or stroke  
 Other. Please specify \_\_\_\_\_  
 None of the above
- Q17 How did you hear about this survey?
- University of the Third Age  
 Blood Pressure UK  
 Other. Please specify \_\_\_\_\_
- Q18 Please provide the first half of your postcode (e.g. ME19 4SH would be ME19. This will be used to analyse results by area only)
- \_\_\_\_\_

- 1  
2  
3  
4  
5  
6  
7  
8  
9  
10  
11  
12  
13  
14  
15  
16  
17  
18  
19  
20  
21  
22  
23  
24  
25  
26  
27  
28  
29  
30  
31  
32  
33  
34  
35  
36  
37  
38  
39  
40  
41  
42  
43  
44  
45  
46  
47  
48  
49  
50  
51  
52  
53  
54  
55  
56  
57  
58  
59  
60
- Q19 When do you expect your next appointment with your GP or nurse at your general practice surgery to be (confirmed or possible)?
- In the next week
  - In the next two weeks
  - In the next month
  - In the next 3 months
  - Don't know
  - None scheduled
- Q20 Would you be prepared to take part in a short (5 minute) follow-on survey after your next appointment? (The follow-on survey will ask further, similar questions about whether and how your blood pressure was measured at the appointment. This will include how many times your blood pressure was measured and what the level of your blood pressure was.)
- Yes (Go to Q21)
  - No (END)
- Q21 In order to take part in the follow-on survey, the researcher will need to contact you by email and needs your consent to do this. Please complete the following participant declaration:
- a) I have read the study information above, had the opportunity to ask questions and have received satisfactory answers (Q1 of 8)
    - Yes
  - b) I understand that this project has been reviewed by, and received ethics clearance through, the University of Oxford Central University Research Ethics Committee (Q2 of 8)
    - Yes
  - c) I understand that my participation is voluntary and I am free to withdraw myself and my data at any time, without giving any reason, and without any adverse consequences (Q3 of 8)
    - Yes
  - d) I understand who will have access to personal data provided (Q4 of 8)
    - Yes
  - e) I understand that personal data will be stored according to the Data Protection Act and will only be accessed by researchers from the Nuffield Department of Primary Care Health Sciences, University of Oxford (Q5 of 8)
    - Yes
  - f) I understand that the research will be written up and published peer-reviewed journals, presented at research meetings and published online as part of a student thesis, deposited both in print and online in the University of Oxford archives (Q6 of 8)
    - Yes
  - g) I understand how to raise concerns or make a complaint (Q7 of 8)
    - Yes
  - h) I agree to take part in the study (Q8 of 8)
    - Yes
  - i) Please enter your email address (This will only be used to contact you via email)  
\_\_\_\_\_

Thank you for taking the time to complete this survey.

only

## Prospective follow-up survey

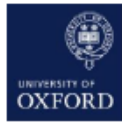

NUFFIELD DEPARTMENT OF  
**PRIMARY CARE**  
HEALTH SCIENCES

Nuffield Department of Primary Care Health Sciences • University of Oxford •  
New Radcliffe House • Radcliffe Observatory Quarter • Woodstock Road •  
Oxford OX2 8GG • [www.phc.ox.ac.uk](http://www.phc.ox.ac.uk)

Sarah Stevens  
+44 (0)1865 289449 • [sarah.stevens@phc.ox.ac.uk](mailto:sarah.stevens@phc.ox.ac.uk)

### Survey of blood pressure measurement in primary care (Survey 2)

- Q1 Please enter your email address (the email address given in survey 1. This will be used to match your responses from both surveys.)  
Email address \_\_\_\_\_
- Q3 When was your last appointment with a GP or practice nurse at your general practice surgery?  
 In the last week  
 In the last month  
 In the last 6 months  
 In the last year  
 More than a year ago  
 Can't remember
- Q4 Who was your last appointment at the surgery with?  
 GP  
 Nurse  
 Can't remember
- Q5 Was your blood pressure measured during your last appointment?  
 Yes, by a GP. Go to Q6  
 Yes, by a nurse. Go to Q6  
 Yes, by yourself in the waiting room. Go to Q6.  
 No. Go to Q9  
 Can't remember
- Q6 How many times was your blood pressure measured during the appointment? Count one measurement for each time the cuff on your arm went up.  
 Once  
 Twice  
 Three times  
 Four or more times  
 Can't remember
- Q7 Did your GP/ nurse tell you your blood pressure level or discuss it with you?  
 Yes  
 No  
 Can't remember
- Q8 Do you know your blood pressure reading from the appointment?  
 Yes. Go to Q9  
 No. Go to Q10  
 Wasn't told. Go to Q10  
 Can't remember. Go to Q10
- Q9 What was your blood pressure reading during the appointment?  
(Your blood pressure consists of two numbers: systolic pressure and diastolic pressure. Systolic pressure is always the larger of the two numbers. For example if your blood pressure was 130/80 mmHg, 130 is the systolic reading and 80 is the diastolic reading.)
- |                    | Systolic | Diastolic |
|--------------------|----------|-----------|
| First measurement  | _____    | _____     |
| Second measurement | _____    | _____     |
| Third measurement  | _____    | _____     |

1  
2  
3  
4 Q10 During your last appointment, were you asked to measure your blood pressure yourself away from the practice e.g. at home?

- 5  Yes  
6  No  
7  Can't remember

8 Thank you for taking the time to complete this survey.  
9  
10  
11  
12  
13  
14  
15  
16  
17  
18  
19  
20  
21  
22  
23  
24  
25  
26  
27  
28  
29  
30  
31  
32  
33  
34  
35  
36  
37  
38  
39  
40  
41  
42  
43  
44  
45  
46  
47  
48  
49  
50  
51  
52  
53  
54  
55  
56  
57  
58  
59  
60

For peer review only

**Table S1: Characteristics of participants completing initial and follow-up surveys**

|                                        | <b>Completed 1st survey<br/>(N=743)</b> | <b>Completed prospective<br/>survey (N=334)</b> |
|----------------------------------------|-----------------------------------------|-------------------------------------------------|
| <b>Characteristic</b>                  | Mean (SD) / N (%)                       | Mean (SD) / N (%)                               |
| <b>Male</b>                            | 377 (50.7)                              | 172 (51.5)                                      |
| <b>Age</b>                             | 57.4 (13.28)                            | 59.3 (12.14)                                    |
| <b>Current smoker</b>                  | 48 (6.5)                                | 25 (7.5)                                        |
| <b>Hypertensive</b>                    | 413 (55.6)                              | 200 (59.9)                                      |
| <b>Antihypertensive<br/>medication</b> | 353 (85.5)                              | 173 (86.5)                                      |
| <b>Diabetes</b>                        | 623 (83.9)                              | 279 (83.5)                                      |
| <b>Previous CVD</b>                    | 62 (8.3)                                | 31 (9.3)                                        |
| <b>Chronic kidney disease</b>          | 25 (3.4)                                | 12 (3.6)                                        |
| <b>Rheumatoid arthritis</b>            | 23 (3.1)                                | 13 (3.9)                                        |
| <b>Told at high risk of CVD</b>        | 55 (7.4)                                | 30 (9.0)                                        |
| <b>Region</b>                          |                                         |                                                 |
| <b>North East</b>                      | 18 (2.4)                                | 9 (2.7)                                         |
| <b>North West</b>                      | 285 (38.4)                              | 125 (37.4)                                      |
| <b>Yorkshire &amp; The Humber</b>      | 55 (7.4)                                | 20 (6.0)                                        |
| <b>East Midlands</b>                   | 23 (3.1)                                | 8 (2.4)                                         |
| <b>West Midlands</b>                   | 38 (5.1)                                | 16 (4.8)                                        |
| <b>East of England</b>                 | 42 (5.7)                                | 28 (8.4)                                        |
| <b>South West</b>                      | 103 (13.9)                              | 49 (14.7)                                       |
| <b>South East</b>                      | 93 (12.5)                               | 57 (17.1)                                       |
| <b>London</b>                          | 50 (6.7)                                | 15 (4.5)                                        |
| <b>Other</b>                           | 8 (1.1)                                 | 2 (0.6)                                         |
| <b>Unknown</b>                         | 28 (3.8)                                | 5 (1.5)                                         |

**Table S2: Participant blood pressure (BP) measurement at their last general practice appointment in those with or without diabetes (initial survey results)**

|                                                             | <b>Participants with diabetes<br/>(N=623)</b> | <b>Participants without diabetes<br/>(N=120)</b> |
|-------------------------------------------------------------|-----------------------------------------------|--------------------------------------------------|
| <b>Did not have their BP<br/>measured</b>                   | 209 (33.6%)                                   | 45 (37.5%)                                       |
| <b>Had their BP measured by a GP</b>                        | 119 (19.1%)                                   | 37 (30.8%)                                       |
| <b>Had their BP measured by a<br/>nurse</b>                 | 286 (45.9%)                                   | 35 (29.2%)                                       |
| <b>Measured their BP themselves<br/>in the waiting room</b> | 9 (1.4%)                                      | 3 (2.5%)                                         |

**Table S3: Number of blood pressure measurements taken in participants with and without diabetes who could recall how many BP readings were taken (initial survey results)**

| Number of blood pressure measurements | Number of participants with diabetes (N=408) | Number of participants without diabetes (N=72) |
|---------------------------------------|----------------------------------------------|------------------------------------------------|
| <b>1</b>                              | 250 (61.3%)                                  | 36 (50.0%)                                     |
| <b>2</b>                              | 124 (30.4%)                                  | 20 (27.8%)                                     |
| <b>3 or more</b>                      | 34 (8.3)                                     | 16 (22.2%)                                     |

**Table S4: Blood pressure values by reading number and total number of readings in 91 participants with diabetes who reported a value for each blood pressure reading in the prospective survey**

|                  | Total number of readings | Mean (95% CI) [Range]                |                                      |                                      |
|------------------|--------------------------|--------------------------------------|--------------------------------------|--------------------------------------|
|                  |                          | Reading number                       |                                      |                                      |
|                  |                          | 1                                    | 2                                    | 3                                    |
| <b>Systolic</b>  | <b>1 (n=66)</b>          | 130.0 (126.6 to 133.3)<br>[110,176]  | -                                    | -                                    |
|                  | <b>2 (n=19)</b>          | 139.4 (131.3 to 147.5)<br>[100,173]  | 131.7 (122.0 to 141.4)<br>[80, 173]  | -                                    |
|                  | <b>3 (n=6)</b>           | 133.3 (127.0 to 139.7)<br>[126, 140] | 133.3 (127.0 to 139.6)<br>[126, 140] | 131.8 (125.3 to 138.4)<br>[121, 139] |
| <b>Diastolic</b> | <b>1 (n=66)</b>          | 74.1 (72.2 to 76.1)<br>[60, 95]      | -                                    | -                                    |
|                  | <b>2 (n=19)</b>          | 84.2 (76.7 to 91.6)<br>[65, 133]     | 79.6 (74.3 to 85.0)<br>[62, 112]     | -                                    |
|                  | <b>3 (n=6)</b>           | 83.3 (70.4 to 96.2)<br>[66, 96]      | 82.5 (71.0 to 94.0)<br>[69, 94]      | 80.2 (70.0 to 90.3)<br>[68, 91]      |



**Table S5: Blood pressure values by reading number and total number of readings in 20 participants without diabetes reporting a value for all blood pressure readings in the prospective survey.**

|                  | Total number of readings | Mean (95% CI) [Range]                |                                      |                                      |
|------------------|--------------------------|--------------------------------------|--------------------------------------|--------------------------------------|
|                  |                          | Reading number                       |                                      |                                      |
|                  |                          | 1                                    | 2                                    | 3                                    |
| <b>Systolic</b>  | <b>1 (n=12)</b>          | 135.8 (115.8 to 155.8)<br>[110, 213] | -<br>-                               | -<br>-                               |
|                  | <b>2 (n=4)</b>           | 160.8 (124.9 to 196.6)<br>[137,181]  | 158.5 (127.7 to 189.3)<br>[137, 179] | -<br>-                               |
|                  | <b>3 (n=4)</b>           | 154.5 (141.2 to 167.8)<br>[147, 166] | 152.3 (141.7 to 162.8)<br>[147, 162] | 144.3 (126.0 to 162.5)<br>[128, 155] |
| <b>Diastolic</b> | <b>1 (n=12)</b>          | 75.3 (67.3 to 83.2)<br>[60, 100]     | -<br>-                               | -<br>-                               |
|                  | <b>2 (n=4)</b>           | 89.8 (75.6 to 103.9)<br>[78, 98]     | 87.8 (70.5 to 105.0)<br>[78, 99]     | -<br>-                               |
|                  | <b>3 (n=4)</b>           | 89.0 (63.1 to 114.9)<br>[70, 108]    | 87.0 (64.5 to 109.5)<br>[69, 101]    | 84.0 (61.9 to 106.1)<br>[65, 97]     |

**Table S6: Blood pressure measurement by diabetes status in a random sample of respondents from unique postcode districts**

|                                    | <b>Participants with diabetes</b><br>BP was measured in = 108/171<br>participants: 22 (20.4%) by a GP, 81 (75%) by a nurse and 5 (4.6%) by the patient |                                           | <b>Participants without diabetes</b><br>BP was measured in = 24/41<br>participants: 15 (62.5%) by a GP, 7 (29.2%) by a nurse and 2 (8.3%) by the patient |                                           |
|------------------------------------|--------------------------------------------------------------------------------------------------------------------------------------------------------|-------------------------------------------|----------------------------------------------------------------------------------------------------------------------------------------------------------|-------------------------------------------|
| <b>Number of times BP measured</b> | <b>N (%)</b>                                                                                                                                           | <b>Asked to measure BP at home (N, %)</b> | <b>N (%)</b>                                                                                                                                             | <b>Asked to measure BP at home (N, %)</b> |
| <b>Once</b>                        | 58 (53.7%)                                                                                                                                             | 6 (10.3%)                                 | 17 (70.8%)                                                                                                                                               | 3 (17.6%)                                 |
| <b>Twice</b>                       | 34 (31.5%)                                                                                                                                             | 7 (20.6%)                                 | 2 (8.3%)                                                                                                                                                 | 2 (100.0%)                                |
| <b>Three or more</b>               | 16 (14.8%)                                                                                                                                             | 5 (31.3%)                                 | 5 (20.8%)                                                                                                                                                | 3 (60.0%)                                 |

**Table S7: Blood pressure values by reading number and total number of readings in a random sample of respondents from unique postcode districts (stratified by diabetes status, in those reporting all BP readings)**

|                                                                                                                          | <b>Total number of readings</b> | <b>Mean (SD)</b>      |              |              |
|--------------------------------------------------------------------------------------------------------------------------|---------------------------------|-----------------------|--------------|--------------|
|                                                                                                                          |                                 | <b>Reading number</b> |              |              |
|                                                                                                                          |                                 | <b>1</b>              | <b>2</b>     | <b>3</b>     |
| <b>Participants with diabetes reporting all BP readings (N=49; 31 (63.3%) had BP measured according to guidelines)</b>   |                                 |                       |              |              |
| <b>Systolic</b>                                                                                                          | <b>1 (n=35)</b>                 | 128.0 (16.3)          | -            | -            |
|                                                                                                                          | <b>2 (n=10)</b>                 | 135.1 (11.8)          | 125.1 (19.3) | -            |
|                                                                                                                          | <b>3 (n=4)</b>                  | 132.5 (6.5)           | 132.0 (6.5)  | 130.8 (7.7)  |
| <b>Diastolic</b>                                                                                                         | <b>1 (n=35)</b>                 | 75.8 (8.7)            | -            | -            |
|                                                                                                                          | <b>2 (n=10)</b>                 | 85.8 (19.1)           | 80.9 (13.6)  | -            |
|                                                                                                                          | <b>3 (n=4)</b>                  | 78.5 (12.3)           | 79.0 (11.7)  | 77.8 (10.8)  |
| <b>Participants without diabetes reporting all BP readings (N=15; 8 (53.3%) had BP measured according to guidelines)</b> |                                 |                       |              |              |
| <b>Systolic</b>                                                                                                          | <b>1 (n=9)</b>                  | 137.0 (36.8)          | -            | -            |
|                                                                                                                          | <b>2 (n=2)</b>                  | 163.5 (24.7)          | 159.0 (15.6) | -            |
|                                                                                                                          | <b>3 (n=4)</b>                  | 154.5 (8.3)           | 152.3 (6.6)  | 144.3 (11.5) |
| <b>Diastolic</b>                                                                                                         | <b>1 (n=9)</b>                  | 78.3 (12.8)           | -            | -            |
|                                                                                                                          | <b>2 (n=2)</b>                  | 93.0 (7.1)            | 89.0 (14.1)  | -            |
|                                                                                                                          | <b>3 (n=4)</b>                  | 89.0 (6.3)            | 87.0 (14.1)  | 84.0 (13.9)  |

**Table S8: Likelihood of having BP measured multiple times or being asked to monitor BP at home, according to patient and practitioner characteristics in patients with and without diabetes from in a random sample of responses from unique postcode districts**

|                                                                           | <b>Likelihood of multiple BP measurements<br/>(n (%) in each group)<br/>(difference [95% confidence interval])</b> | <b>Likelihood of being asked to monitor BP at home<br/>(n (%) in each group)<br/>(difference [95% confidence interval])</b> |
|---------------------------------------------------------------------------|--------------------------------------------------------------------------------------------------------------------|-----------------------------------------------------------------------------------------------------------------------------|
| <b>In patients with diabetes</b>                                          |                                                                                                                    |                                                                                                                             |
| <b>If the patient is hypertensive vs. normotensive</b>                    | 31/55 (56.4%) vs. 19/53 (35.9%)<br>difference = 20.5% [2.1 to 38.9%]                                               | 14/88 (15.9%) vs. 10/83 (12.1%)<br>difference = 3.9% [-6.5 to 14.2%]                                                        |
| <b>If the patient has treated hypertension vs. untreated hypertension</b> | 27/48 (56.3%) vs. 4/7 (57.1%)<br>difference = 0.9% [-38.4 to 40.1%]                                                | 13/75 (17.3%) vs. 1/13 (7.7%)<br>difference = 9.6% [-7.2 to 26.5%]                                                          |
| <b>If BP was measured by a GP vs. a nurse</b>                             | 12/22 (54.5%) vs. 36/81 (44.4%)<br>difference = 10.1% [-13.4 to 33.6%]                                             | 7/22 (31.8%) vs. 9/81 (11.1%)<br>difference = 20.7% [0.1 to 41.3%]                                                          |
| <b>In patients without diabetes</b>                                       |                                                                                                                    |                                                                                                                             |
| <b>If the patient is hypertensive vs. normotensive</b>                    | 6/19 (31.6%) vs. 1/5 (20.0%)<br>difference = 11.6% [-29.2 to 52.4%]                                                | 11/31 (35.5%) vs. 0/10 (0.0%)<br>difference = 35.5% [18.6% to 52.3%]                                                        |
| <b>If the patient has treated hypertension vs. untreated hypertension</b> | 5/15 (33.3%) vs. 1/4 (25.0%)<br>difference = 8.3% [-40.3 to 57.0%]                                                 | 7/23 (30.4%) vs. 4/8 (50.0%)<br>difference = 19.6% [-19.9 to 59.0%]                                                         |
| <b>If BP was measured by a GP vs. a nurse</b>                             | 5/15 (33.3%) vs. 2/7 (28.6%)<br>difference = 4.8% [-36.3 to 45.9%]                                                 | 6/15 (40.0%) vs. 2/7 (28.6%)<br>difference = 11.4% [-30.2 to 53.1%]                                                         |

**Table S9: Blood pressure measurement by diabetes status, excluding possible duplicate submissions**

|                                    | <b>Participants with diabetes</b><br>BP was measured in = 172/263<br>participants: 36 (20.9%) by a GP, 130 (75.6%) by a nurse and 6 (3.5%) by the patient |                                           | <b>Participants without diabetes</b><br>BP was measured in = 33/54<br>participants: 21 (63.6%) by a GP, 10 (30.3%) by a nurse and 2 (6.1%) by the patient |                                           |
|------------------------------------|-----------------------------------------------------------------------------------------------------------------------------------------------------------|-------------------------------------------|-----------------------------------------------------------------------------------------------------------------------------------------------------------|-------------------------------------------|
| <b>Number of times BP measured</b> | <b>N (%)</b>                                                                                                                                              | <b>Asked to measure BP at home (N, %)</b> | <b>N (%)</b>                                                                                                                                              | <b>Asked to measure BP at home (N, %)</b> |
| <b>Once</b>                        | 100 (58.1%)                                                                                                                                               | 10 (10.0%)                                | 22 (66.6%)                                                                                                                                                | 5 (22.7%)                                 |
| <b>Twice</b>                       | 50 (29.1%)                                                                                                                                                | 11 (22.0%)                                | 5 (12.2%)                                                                                                                                                 | 3 (60.0%)                                 |
| <b>Three or more</b>               | 22 (12.8%)                                                                                                                                                | 7 (31.8%)                                 | 6 (18.2%)                                                                                                                                                 | 3 (50.0%)                                 |

**Table S10: Blood pressure values by reading number and total number of readings excluding possible duplicate submissions (stratified by diabetes status, in those reporting all BP readings)**

|                                                                                                                           | <b>Total number of readings</b> | <b>Mean (SD)</b>      |              |              |
|---------------------------------------------------------------------------------------------------------------------------|---------------------------------|-----------------------|--------------|--------------|
|                                                                                                                           |                                 | <b>Reading number</b> |              |              |
|                                                                                                                           |                                 | <b>1</b>              | <b>2</b>     | <b>3</b>     |
| <b>Participants with diabetes reporting all BP readings (N=91; 58 (63.7%) had BP measured according to guidelines)</b>    |                                 |                       |              |              |
| <b>Systolic</b>                                                                                                           | <b>1 (n=66)</b>                 | 130.0 (13.5)          | -            | -            |
|                                                                                                                           | <b>2 (n=19)</b>                 | 139.4 (16.8)          | 131.7 (20.1) | -            |
|                                                                                                                           | <b>3 (n=6)</b>                  | 133.3 (6.1)           | 133.3 (6.0)  | 131.8 (6.2)  |
| <b>Diastolic</b>                                                                                                          | <b>1 (n=66)</b>                 | 74.1 (7.9)            | -            | -            |
|                                                                                                                           | <b>2 (n=19)</b>                 | 84.2 (15.4)           | 79.6 (11.1)  | -            |
|                                                                                                                           | <b>3 (n=6)</b>                  | 83.3 (12.3)           | 82.5 (10.9)  | 80.2 (9.7)   |
| <b>Participants without diabetes reporting all BP readings (N=20; 12 (60.0%) had BP measured according to guidelines)</b> |                                 |                       |              |              |
| <b>Systolic</b>                                                                                                           | <b>1 (n=12)</b>                 | 135.8 (31.5)          | -            | -            |
|                                                                                                                           | <b>2 (n=4)</b>                  | 160.8 (22.5)          | 158.5 (19.4) | -            |
|                                                                                                                           | <b>3 (n=4)</b>                  | 154.5 (8.3)           | 152.3 (6.7)  | 144.3 (11.5) |
| <b>Diastolic</b>                                                                                                          | <b>1 (n=12)</b>                 | 75.3 (12.5)           | -            | -            |
|                                                                                                                           | <b>2 (n=4)</b>                  | 89.8 (8.9)            | 87.8 (10.8)  | -            |
|                                                                                                                           | <b>3 (n=4)</b>                  | 89.0 (16.3)           | 87.0 (14.1)  | 84.0 (13.9)  |

**Table S11: Likelihood of having BP measured multiple times or being asked to monitor BP at home, according to patient and practitioner characteristics in patients with and without diabetes, excluding possible duplicate submissions**

|                                                                           | <b>Likelihood of multiple BP measurements<br/>(n (%) in each group)<br/>(difference [95% confidence interval])</b> | <b>Likelihood of being asked to monitor BP at home<br/>(n (%) in each group)<br/>(difference [95% confidence interval])</b> |
|---------------------------------------------------------------------------|--------------------------------------------------------------------------------------------------------------------|-----------------------------------------------------------------------------------------------------------------------------|
| <b>In patients with diabetes</b>                                          |                                                                                                                    |                                                                                                                             |
| <b>If the patient is hypertensive vs. normotensive</b>                    | 45/98 (45.9%) vs. 27/74 (36.5%)<br>difference = 9.4% [-5.3 to 24.2%]                                               | 24/153 (15.7%) vs. 11/110 (10.0%)<br>difference = 5.7% [-2.4 to 13.7%]                                                      |
| <b>If the patient has treated hypertension vs. untreated hypertension</b> | 39/88 (44.3%) vs. 6/10 (60.0%)<br>difference = 15.7% [-16.4 to 47.8%]                                              | 22/135 (16.3%) vs. 2/18 (11.1%)<br>difference = 5.2% [-10.6 to 21.0%]                                                       |
| <b>If BP was measured by a GP vs. a nurse</b>                             | 16/36 (44.4%) vs. 54/130 (41.5%)<br>difference = 2.9% [-15.4 to 21.2%]                                             | 11/36 (30.6%) vs. 15/130 (11.5%)<br>difference = 19.0% [3.0 to 35.0%]                                                       |
| <b>In patients without diabetes</b>                                       |                                                                                                                    |                                                                                                                             |
| <b>If the patient is hypertensive vs. normotensive</b>                    | 9/27 (33.3%) vs. 2/6 (33.3%)<br>difference = 0.0% [-41.7 to 41.7%]                                                 | 14/40 (35.0%) vs. 0/14 (0.0%)<br>difference = 35.0% [20.2 to 49.8%]                                                         |
| <b>If the patient has treated hypertension vs. untreated hypertension</b> | 8/22 (36.4%) vs. 1/5 (20.0%)<br>difference = 16.4% [-24.1 to 56.8%]                                                | 9/31 (29.0%) vs. 5/9 (55.6%)<br>difference = 26.5% [-9.7 to 62.7%]                                                          |
| <b>If BP was measured by a GP vs. a nurse</b>                             | 9/21 (42.9%) vs. 2/10 (20.0%)<br>difference = 22.9% [-9.7 to 55.5%]                                                | 7/21 (33.3%) vs. 4/10 (40.0%)<br>difference = 6.7% [-29.8 to 43.1%]                                                         |

**STROBE 2007 (v4) Statement—Checklist of items that should be included in reports of *cross-sectional studies***

| Section/Topic                | Item # | Recommendation                                                                                                                                                                       | Reported on page # |
|------------------------------|--------|--------------------------------------------------------------------------------------------------------------------------------------------------------------------------------------|--------------------|
| <b>Title and abstract</b>    | 1      | (a) Indicate the study's design with a commonly used term in the title or the abstract                                                                                               | 1                  |
|                              |        | (b) Provide in the abstract an informative and balanced summary of what was done and what was found                                                                                  | 2                  |
| <b>Introduction</b>          |        |                                                                                                                                                                                      |                    |
| Background/rationale         | 2      | Explain the scientific background and rationale for the investigation being reported                                                                                                 | 3                  |
| Objectives                   | 3      | State specific objectives, including any prespecified hypotheses                                                                                                                     | 3                  |
| <b>Methods</b>               |        |                                                                                                                                                                                      |                    |
| Study design                 | 4      | Present key elements of study design early in the paper                                                                                                                              | 4                  |
| Setting                      | 5      | Describe the setting, locations, and relevant dates, including periods of recruitment, exposure, follow-up, and data collection                                                      | 4                  |
| Participants                 | 6      | (a) Give the eligibility criteria, and the sources and methods of selection of participants                                                                                          | 4                  |
| Variables                    | 7      | Clearly define all outcomes, exposures, predictors, potential confounders, and effect modifiers. Give diagnostic criteria, if applicable                                             | 4                  |
| Data sources/<br>measurement | 8*     | For each variable of interest, give sources of data and details of methods of assessment (measurement). Describe comparability of assessment methods if there is more than one group | 4/ Supplement      |
| Bias                         | 9      | Describe any efforts to address potential sources of bias                                                                                                                            | 4                  |
| Study size                   | 10     | Explain how the study size was arrived at                                                                                                                                            | 4                  |
| Quantitative variables       | 11     | Explain how quantitative variables were handled in the analyses. If applicable, describe which groupings were chosen and why                                                         | 4                  |
| Statistical methods          | 12     | (a) Describe all statistical methods, including those used to control for confounding                                                                                                | 4                  |
|                              |        | (b) Describe any methods used to examine subgroups and interactions                                                                                                                  | 4                  |
|                              |        | (c) Explain how missing data were addressed                                                                                                                                          | 5                  |
|                              |        | (d) If applicable, describe analytical methods taking account of sampling strategy                                                                                                   | N/A                |
|                              |        | (e) Describe any sensitivity analyses                                                                                                                                                | 4                  |
| <b>Results</b>               |        |                                                                                                                                                                                      |                    |

|                          |     |                                                                                                                                                                                                              |                             |
|--------------------------|-----|--------------------------------------------------------------------------------------------------------------------------------------------------------------------------------------------------------------|-----------------------------|
| Participants             | 13* | (a) Report numbers of individuals at each stage of study—eg numbers potentially eligible, examined for eligibility, confirmed eligible, included in the study, completing follow-up, and analysed            | 5/ Figure 1                 |
|                          |     | (b) Give reasons for non-participation at each stage                                                                                                                                                         | Figure 1                    |
|                          |     | (c) Consider use of a flow diagram                                                                                                                                                                           | Figure 1                    |
| Descriptive data         | 14* | (a) Give characteristics of study participants (eg demographic, clinical, social) and information on exposures and potential confounders                                                                     | Table 1/ Table S1           |
|                          |     | (b) Indicate number of participants with missing data for each variable of interest                                                                                                                          | 5/Table 1/ S1               |
| Outcome data             | 15* | Report numbers of outcome events or summary measures                                                                                                                                                         | 5                           |
| Main results             | 16  | (a) Give unadjusted estimates and, if applicable, confounder-adjusted estimates and their precision (eg, 95% confidence interval). Make clear which confounders were adjusted for and why they were included | 5/ Table 2/ Figures 2 and 3 |
|                          |     | (b) Report category boundaries when continuous variables were categorized                                                                                                                                    | N/A                         |
|                          |     | (c) If relevant, consider translating estimates of relative risk into absolute risk for a meaningful time period                                                                                             | N/A                         |
| Other analyses           | 17  | Report other analyses done—eg analyses of subgroups and interactions, and sensitivity analyses                                                                                                               | 5/Supplement                |
| <b>Discussion</b>        |     |                                                                                                                                                                                                              |                             |
| Key results              | 18  | Summarise key results with reference to study objectives                                                                                                                                                     | 6                           |
| Limitations              | 19  | Discuss limitations of the study, taking into account sources of potential bias or imprecision. Discuss both direction and magnitude of any potential bias                                                   | 6                           |
| Interpretation           | 20  | Give a cautious overall interpretation of results considering objectives, limitations, multiplicity of analyses, results from similar studies, and other relevant evidence                                   | 7/8                         |
| Generalisability         | 21  | Discuss the generalisability (external validity) of the study results                                                                                                                                        | 7                           |
| <b>Other information</b> |     |                                                                                                                                                                                                              |                             |
| Funding                  | 22  | Give the source of funding and the role of the funders for the present study and, if applicable, for the original study on which the present article is based                                                | 9                           |

\*Give information separately for cases and controls in case-control studies and, if applicable, for exposed and unexposed groups in cohort and cross-sectional studies.

**Note:** An Explanation and Elaboration article discusses each checklist item and gives methodological background and published examples of transparent reporting. The STROBE checklist is best used in conjunction with this article (freely available on the Web sites of PLoS Medicine at <http://www.plosmedicine.org/>, Annals of Internal Medicine at <http://www.annals.org/>, and Epidemiology at <http://www.epidem.com/>). Information on the STROBE Initiative is available at [www.strobe-statement.org](http://www.strobe-statement.org).
